1 **Two independent approaches converge to the cloning of a new *Leptosphaeria maculans* avirulence**  
2 **effector gene, *AvrLmS-Lep2***

3

4 Ting Xiang Neik<sup>1&</sup>, Kaveh Ghanbarnia<sup>2,3&</sup>, Bénédicte Ollivier<sup>4</sup>, Armin Scheben<sup>1,5</sup>, Anita Severn-Ellis<sup>1</sup>,  
5 Nicholas J. Larkan<sup>2,6</sup>, Parham Haddadi<sup>2</sup>, W.G. Dilantha Fernando<sup>3</sup>, Thierry Rouxel<sup>4</sup>, Jacqueline Batley<sup>1</sup>,  
6 Hossein M. Borhan<sup>2#</sup>, Marie-Hélène Balesdent<sup>4#</sup>

7 <sup>1</sup> School of Biological Sciences, University of Western Australia, Perth, WA, Australia

8 <sup>2</sup> Agriculture and Agri-Food Canada, Saskatoon, SK, Canada

9 <sup>3</sup> University of Manitoba, Winnipeg, MB, Canada

10 <sup>4</sup> Université Paris-Saclay, INRAE, AgroParisTech, UMR Bioger, Avenue Lucien Brétignières, F-78850 Thiverval-  
11 Grignon, France.

12 <sup>5</sup> Simons Center for Quantitative Biology, Cold Spring Harbor Laboratory, Cold Spring Harbor, NY, 11724, United  
13 States of America

14 <sup>6</sup> Armatus Genetics Inc., Saskatoon, SK, Canada

15 <sup>&</sup> These authors made equal contribution.

16 <sup>#</sup> Corresponding authors: [marie-helene.balesdent@inrae.fr](mailto:marie-helene.balesdent@inrae.fr), [hossein.borhan@canada.ca](mailto:hossein.borhan@canada.ca)

17 **Keywords:** avirulence, resistance, *Brassica napus*, canola, oilseed rape, *AvrLmS*, *AvrLep2*

18 **Running title:** *AvrLmS-Lep2* cloning by BSA sequencing

19 **Word count Total : 6999**

20 **Summary: 243**

21 **Introduction: 801**

22 **Results: 2240**

23 **Discussion: 1124**

24 **Experimental procedures: 1849**

25 **Acknowledgments: 67**

26 **Table and figure legends: 675**

27 **Summary:**

28 *Leptosphaeria maculans*, the causal agent of blackleg disease, interacts with *Brassica napus* (oilseed  
29 rape, canola) in a gene-for-gene manner. The avirulence genes *AvrLmS* and *AvrLep2* were described  
30 to be perceived by the resistance genes *RlmS* and *LepR2*, respectively, present in the cultivar Surpass  
31 400. Here we report cloning of *AvrLmS* and *AvrLep2* using two independent methods. *AvrLmS* was  
32 cloned using combined *in vitro* crossing between avirulent and virulent isolates with sequencing of  
33 DNA bulks from avirulent or virulent progeny (Bulked-Segregant-Sequencing) to rapidly identify one  
34 candidate avirulence gene present in the effector repertoire of *L. maculans*. *AvrLep2* was cloned  
35 using a bi-parental cross of avirulent and virulent *L. maculans* isolates and a classical map-based  
36 cloning approach. Taking these two approaches independently, we found that *AvrLmS* and *AvrLep2*  
37 are the same gene. Complementation of virulent isolates with this gene confirmed its role in  
38 inducing resistance on Surpass 400 and Topas-*LepR2*. The gene renamed *AvrLmS-Lep2* encodes for a  
39 small cysteine-rich protein of unknown function with an N-terminal secretory signal peptide, which  
40 are common features of the majority of effectors from extracellular fungal plant pathogens. The  
41 *AvrLmS-Lep2* / *LepR2* interaction phenotype was found to vary from a typical hypersensitive  
42 response to intermediate resistance sometimes at the edge of, or evolving toward, susceptibility  
43 depending on the inoculation conditions. *AvrLmS-Lep2* was nevertheless sufficient to significantly  
44 reduce the stem lesion size on plant genotypes with *LepR2*, indicating the potential efficiency of this  
45 resistance to control the disease in the field.

46

47 INTRODUCTION

48 Stem canker, or blackleg disease, caused by the ascomycete *Leptosphaeria maculans*, is a major  
49 disease of oilseed rape (canola, *Brassica napus*) (Fitt *et al.*, 2006). Gene-for-gene interactions  
50 between *L. maculans* and *B. napus* have been described. At least 18 resistance (*R*) genes have been  
51 reported for the *L. maculans-Brassica* interaction, with only two cloned to date; *LepR3* and *Rlm2*  
52 (Delourme *et al.*, 2004; Yu *et al.*, 2005; Delourme *et al.*, 2006; Rimmer, 2006; Yu *et al.*, 2008; Van de  
53 Wouw *et al.*, 2009; Long *et al.*, 2011; Larkan *et al.*, 2013, 2015). In contrast, eight avirulence (*Avr*)  
54 genes have already been cloned from *L. maculans*; *AvrLm1*, *AvrLm2*, *AvrLm3*, *AvrLm4-7*, *AvrLm5-9*,  
55 *AvrLm6*, *AvrLm10* and *AvrLm11* (Gout *et al.*, 2006; Fudal *et al.*, 2007; Parlange *et al.*, 2009; Balesdent  
56 *et al.*, 2013; Van de Wouw *et al.*, 2014; Ghanbarnia *et al.*, 2015; Plissonneau *et al.*, 2016, Ghanbarnia  
57 *et al.*, 2018, Petit-Houdenot *et al.*, 2019). Map-based cloning of the first *AvrLm* genes (*AvrLm1*,  
58 *AvrLm6* and *AvrLm4-7*; Gout *et al.*, 2006; Fudal *et al.*, 2007; Parlange *et al.*, 2009) took many years  
59 due to the lack of a *L. maculans* genome sequence and their location in the repeat-rich, gene-poor

60 regions of the genome (Rouxel *et al.*, 2011). More recently, cloning of *AvrLm11*, *AvrLm2* and *AvrLm5-*  
61 *9* showed that the availability of a reference genome and a repertoire of effector genes facilitated  
62 the identification of candidate avirulence genes (Balesdent *et al.*, 2013; Ghanbarnia *et al.*, 2015;  
63 2018).

64 The use of race-specific resistance genes in Brassica species (*Rlm* and *LepR*) is an efficient way to  
65 control stem canker. However, such resistances can be rapidly overcome following emergence and  
66 selection of virulent isolates in fungal populations (i.e., Sprague *et al.*, 2006). Four *R* genes (*LepR1*,  
67 *LepR2*, *LepR3* and *LepR4*) were genetically characterised in *Brassica rapa* subsp. *sylvestris* (Yu *et al.*,  
68 2005, 2008, 2013). *B. rapa* subsp. *sylvestris* was used as a source of resistance to *L. maculans* in the  
69 1990s (Crouch *et al.*, 1994) and introduced into *B. napus* cv. as “*sylvestris*-derived resistance”. From  
70 2000 to 2003, the *B. napus* variety Surpass 400 and derivative cultivars containing *sylvestris*-derived  
71 resistance were grown on large acreages across Australia before the resistance was overcome in the  
72 Eyre Peninsula region of South Australia (Li *et al.*, 2004; Sprague *et al.*, 2006). Based on the genetic  
73 analysis of fungal isolates that overcame the Surpass 400 resistance, Van de Wouw *et al.* (2009)  
74 reported that at least two avirulence genes, *AvrLm1* and *AvrLmS*, conveyed avirulence towards  
75 Surpass 400, supporting the idea of an *RlmS-AvrLmS* interaction in the host plant. Genetic analyses  
76 of the Surpass 400 resistance described either one or two resistance loci (Li & Cowling, 2003; Yu *et al.*,  
77 2008; Long *et al.*, 2011), termed *LepR3* (Yu *et al.*, 2008), BRLMR1 and BRLMR2 (Long *et al.*, 2011),  
78 or *LepR3* and *RlmS* (Larkan *et al.*, 2013). Larkan *et al.* (2013) mapped and cloned the resistance gene  
79 *LepR3* from Surpass 400 and showed that *LepR3* recognizes the *AvrLm1* protein. *LepR3* can therefore  
80 be considered a functional homologue of *Rlm1*, though *LepR3* and *Rlm1* reside on different  
81 chromosomes (A10 and A07, respectively). It was also demonstrated that a second resistance gene  
82 was present in Surpass 400, likely corresponding to the *AvrLmS* avirulence gene, i.e. *RlmS* (Larkan *et al.*,  
83 2013). However, uncertainties on the *RlmS* resistance remain since Yu *et al.* (2008) noted the  
84 possible presence of *LepR2* or a similar gene in Surpass 400 along with *LepR3*.

85 Dissection of *R* gene content in a variety and conclusions on genetic determination of the resistance  
86 only rely on phenotypic evaluation of the interaction based on inoculation tests with *L. maculans*  
87 field isolates, whose avirulence (AVR) gene content may differ from one study to the other. Due to  
88 epistatic effects between avirulence genes, a single gene control of a resistant phenotype toward a  
89 given isolate may hide a more complex *R* gene determination due to the lack of adequate differential  
90 isolates. Cloning of the matching AVR genes can thus help us understand the genetic basis and  
91 potential equivalence, or at least functional redundancy, between *R* genes with different names. In  
92 the current study, we report on the cloning of the avirulence gene corresponding to *RlmS* and *LepR2*

93 using two independent approaches. On the one hand, the AVR gene recognized by *LepR2*, *AvrLep2*,  
94 was cloned following a standard map-based cloning approach, whilst, the gene interacting with  
95 *RlmS*, *AvrLmS*, was cloned using a bulked-segregant sequencing (BSS) strategy. The two approaches  
96 identified the same avirulence gene, which shares all characteristics of *L. maculans* avirulence  
97 effector genes. Noticeably, the two strategies were efficient although the resistant interaction  
98 phenotype appeared to be variable depending on environmental conditions. This work also suggests  
99 that *LepR2* and *RlmS* may be the same Brassica *R* gene. Until that is determined we will refer to the  
100 common effector as *AvrLmS-Lep2*.

101

## 102 **RESULTS**

### 103 **Approach 1: Bulk segregant sequencing (BSS)**

#### 104 **Phenotypic characterization of X82 progeny for bulked segregant sequencing**

105 A progeny was created for BSS, following a cross (#82) between isolates WT50 and INV13.269,  
106 segregating for avirulence on *B. napus* cv. Surpass 400. Parental and progeny isolates phenotyping  
107 on an extended *B. napus* differential set revealed that *AvrLm6*, *AvrLm4-7* and *AvrLmS* segregated in  
108 cross #82 (Table 1). Their segregation fitted the expected 50:50 ratio (Table 1). In addition, eight  
109 phenotypic classes were recovered in the progeny, with ratios fitting the hypothesis of  
110 independence between *AvrLm6*, *AvrLm4-7* and *AvrLmS* (Table 1,  $\chi^2=8.25$ ,  $P=0.689$ ) as previously  
111 established (Van de Wouw *et al.*, 2009). Following this phenotyping step, 47 isolates were selected  
112 for the preparation of six bulks of DNA. Bulk 1 contained DNA from 25 progeny isolates with an  
113 avirulent phenotype on Surpass 400 but either virulent or avirulent on *Rlm6* or *Rlm7*; Bulk 2  
114 comprised DNA from 22 progeny isolates virulent on Surpass 400; Bulk 3 contained DNA from 24  
115 avirulent isolates on *Rlm7*, but either virulent or avirulent on *Rlm6* or *RlmS* and Bulk 4 contained  
116 DNA from 23 isolates virulent on *Rlm7*; Bulks 5 and 6 contained isolates being avirulent on *RlmS* and  
117 *Rlm7*, or virulent on both genes, respectively (Table 2).

#### 118 **BSS statistics and validation of the BSS strategy**

119 The Illumina whole-genome sequencing generated reads (2 x 150 bp) from the six bulks and the two  
120 parental isolates. After quality trimming, the average number of reads generated was in the range of  
121 47 – 75 million and the average genome coverage depth ranged between 164 X and 272 X  
122 (Supplementary Table 1). In total, 65,727 SNPs were identified between the parental isolates,  
123 excluding 19,650 SNPs in repetitive regions. The average number of SNPs found in the bulked  
124 progeny was 64,473 (Supplementary Table 2). After quality filtering for QTL mapping in the bulked

125 pairs, the total number of SNPs retained was 27,532 (Bulks 3/4), 27,128 (Bulks 1/2) and 26,010  
126 (Bulks 5/6).

127 To validate the BSS strategy for AVR gene cloning, a QTL-Seq analysis was carried out using Bulk 3  
128 (A7) vs. Bulk 4 (a7), differing for the gene *AvrLm4-7*. A QTL was found on scaffold JN3\_SC03 (genome  
129 version of Dutreux *et al.*, 2018) at position 62,390 to 345,050 (Supplementary Figure 1,  
130 Supplementary Tables 3-4). This region contains 50 predicted genes (Lmb\_jn3\_03239 to  
131 Lmb\_jn3\_03288) including *AvrLm4-7* (GenBank nucleotide sequence AM998638.1, Lmb\_jn3\_03262).  
132 This result validates the BSS strategy for identification of a genomic region containing a gene of  
133 interest and suggests that the size of the bulks (23 and 24 isolates) is adequate for this purpose.

#### 134 **Identification of a candidate gene for *AvrLmS* using BSS**

135 QTL-Seq results for Bulk 1 (AS) vs. Bulk 2 (aS) and Bulk 5 (AS7) vs. Bulk 6 (aS7) were compared to  
136 identify the candidate region for *AvrLmS*. The analysis revealed a QTL for *AvrLmS* within a 335 kb  
137 (Bulks 5/6) or 816 kb (Bulks 1/2) region on JN3\_SC09 (Figure 1, Figure 2, Supplementary Tables 4-6).  
138 The QTL for both bulked pairs overlapped, with the major QTL supported by the most SNPs and the  
139 highest  $\Delta$ SNP value showing peaks at position 1,481,733 in Bulks 1/2 and Bulks 5/6. Candidate SNP  
140 analysis for *AvrLmS* using Bulk 1/2, Bulk 5/6 and both parents (Samples 7/8) confirmed the QTL-Seq  
141 results, identifying a total of 437 genome-wide SNPs that segregate with the avirulence trait. Of  
142 these, 410 were found on JN3\_SC09, with all SNPs found in a 398 kb region overlapping with the QTL  
143 region (position: 1,477,092- 1,874,868 bp). This region contains 28 genes (Lmb\_jn3\_08331 to  
144 Lmb\_jn3\_08358). The candidate region also contains a 285 kb AT-rich region (JN3\_SC09:1,533,065-  
145 1,818,564), enriched in repeats (Supplementary Figures 2-3, Supplementary Table 7), typical for  
146 genomic regions encompassing AVR genes in *L. maculans* (Rouxel *et al.*, 2011). Only one gene,  
147 Lmb\_jn3\_08343, was located in this AT-rich region. The number of reads mapped to Lmb\_jn3\_08343  
148 was over 600 for each of the *AvrLmS* bulks and the *AvrLmS* parent INV13.269, with every single base  
149 of the coding sequence covered by reads (Table 2). Comparatively, only three reads mapped to  
150 Lmb\_jn3\_08343 in the *avrLmS* bulk sample and the virulent parent WT50 (Table 2). Read coverage  
151 analysis revealed a ~3 kb region (1,611,953-1,614,969 bp), with zero or close to zero base coverage  
152 in all the *avrLmS* bulk samples (Bulk 2, Bulk 6 and Parent WT50) whereas all the *AvrLmS* bulk samples  
153 (Bulk 1, Bulk 5 and Parent INV13.269) had per base coverage between 100 to 400 within this region.  
154 The ~3 kb putative deletion contains the candidate gene Lmb\_jn3\_08343 (Figure 2, Supplementary  
155 Figure 3). This gene fulfils all criteria for a *L. maculans* avirulence gene candidate: (i) sequence  
156 variation, either in terms of SNPs or presence/absence variation (ii) genomic location in a gene-poor,  
157 AT-rich region and (iii) lack of sequence homology with other AVR genes or any protein in the

158 database, except a weak homology with another candidate effector gene in *L. maculans*  
159 (Lmb\_jn3\_03815; 39.50% identity, e-value=1e-20).

## 160 **Approach 2: Map-based identification of a candidate gene for *AvrLep2***

161 Under the conditions used for pathotyping at AAFC Saskatoon, the isolate v23.1.3 (JN3) produced an  
162 intermediate-virulent phenotype, with little to no plant response, on the cotyledons of plants  
163 carrying *LepR2* and was thus deemed 'virulent'. The population of *L. maculans* F<sub>1</sub> progeny produced  
164 from crossing v23.1.3 (*avrLep2*) and 00-100 (*AvrLep2*) segregated for virulence (41 isolates) and  
165 avirulence (57 isolates) towards *LepR2*, with the segregation ratio approximating a 1:1 ratio ( $\chi^2 =$   
166 2.61,  $P = 0.11$ ), as expected for genetic control of the phenotype by a single AVR gene. All 98  
167 progenies were virulent on the susceptible line Topas DH16516. One hundred and fifty five KASP  
168 (Kompetitive Allele Specific PCR) markers were developed based on the whole genome sequence  
169 and predicted effector genes of *L. maculans* v23.1.3 and were applied to the progeny of the v23.1.3  
170 X 00-100 cross. Two markers, K16-S3-1675 and K-S3-2160, closely segregated with the *AvrLep2* locus  
171 and spanned a physical interval of approximately 485 kb of the *L. maculans* genome. To more  
172 precisely map the *AvrLep2* locus, an additional eleven KASP markers were designed within the  
173 *AvrLep2* interval. The resulting map showed that *AvrLep2* resided within an interval of 319 kb  
174 between two markers, K-S3-1761 and K-S3-2080 (Figure 3). To improve the predicted gene  
175 annotation within the *AvrLep2* interval, previously generated RNA-Seq data produced from *L.*  
176 *maculans* infected *B. napus* seedling (Haddadi *et al.*, 2016; 2019) were mapped to the *L. maculans*  
177 genome. Genes within the *AvrLep2* interval were manually annotated and a predicted secreted  
178 protein was identified as the *AvrLep2* candidate.

179

## 180 **Two approaches, one 'typical' avirulence effector gene candidate**

181 The two cloning strategies identified the same candidate gene, Lmb\_jn3\_08343, which is 426 bp and  
182 contains one exon. In isolate v23.1.3, it is located in a typical AT-rich region of 285 Kb containing one  
183 single gene (Figure 3, Supplementary Figure 3). It encodes for a small (141 AA) putative secreted  
184 (SignalP 4.1, Petersen *et al.*, 2011) protein enriched in cysteines (8 cysteine residues in the mature  
185 protein). PCR amplification confirmed the gene was absent in the virulent isolate WT50 and in all  
186 virulent isolates in X82 progeny, while sequencing of the gene in the avirulent isolate INV13.269  
187 indicated it is 100% identical to that of v23.1.3.

188 We examined single nucleotide polymorphism (SNP) events within the candidate gene in the  
189 previously-resequenced genomes of 36 additional *L. maculans* isolates from the AAFC collection (5

190 *avrLep2* and 31 *AvrLep2* isolates; Ghanbarnia *et al.*, 2015). The candidate gene was present in all  
191 isolates. In total, eight nucleotide changes were observed in the candidate gene of which four  
192 resulted in non-synonymous amino acid substitutions (Supplementary Table 8 and Supplementary  
193 Figure 4). Among the mutations only A<sup>278</sup> was invariant in all avirulent isolates, while G<sup>278</sup> was  
194 present in most virulent isolates.

### 195 **Validation of candidate genes**

196 Two independent validation experiments were performed. First, WT50 (virulent on *RlmS* and *Rlm6*)  
197 and its progeny isolate X82.14 (virulent on *Rlm6*, *Rlm7* and *RlmS*), both deleted for the candidate  
198 gene, were complemented with the wild type copy (v23.1.3 allele) of the candidate gene  
199 (*Lmb\_jn3\_08343*). All complemented isolates remained fully virulent toward *Rlm1*, *Rlm2*, *Rlm3*,  
200 *Rlm4*, *Rlm6*, and *Rlm9* (Figure 4). In addition, X82.14 complemented isolates remained virulent  
201 towards *Rlm7*. All complemented isolates were found to induce the typical intermediate resistance  
202 of isolate INV13.269 on Surpass 400. Because of the presence of *AvrLm1* in v23.1.3, interacting with  
203 *LepR3* present in Surpass 400 (Larkan *et al.*, 2013), the characteristics of the phenotype induced on  
204 Surpass 400 by the v23.1.3 *Lmb\_jn3\_08343* allele could not be determined following inoculation  
205 with v23.1.3. However, the interaction phenotype of INV13.269 and of complemented isolates with  
206 the v23.1.3 allele confirmed this allele confers an intermediate phenotype on Surpass 400, which  
207 could develop toward susceptibility with time in some plants, as initially described (Van de Wouw *et*  
208 *al.*, 2009). Finally, all complemented isolates were virulent on Topas DH16516 but displayed a clear  
209 resistant phenotype on Topas-*LepR2* (Figures 4-5). Therefore, *Lmb\_jn3\_08343* encodes for the  
210 avirulence effector protein matching *RlmS* and is also able to elicit the *LepR2* resistance response.

211 Secondly, two types of construct for transformation using the *AvrLep2* candidate allele from *L.*  
212 *maculans* isolate 00-100 were produced, i.e. either with its native promotor, or with the promotor of  
213 the avirulence gene *AvrLm1*. After transforming the 'virulent' isolate v23.1.3 with the candidate  
214 gene constructs, restoration of avirulence phenotype was evaluated by inoculation of transgenic  
215 isolates on Topas-*LepR2* (Table 3). Transformant selections for each of the constructs were tested on  
216 the *B. napus* differential lines and showed avirulence on cotyledons of Topas-*LepR2* plants but  
217 remained virulent on the susceptible Topas DH16516 and Westar control lines (Figure 6). Positive  
218 transformants also showed wild-type interaction phenotypes with the differential lines harbouring  
219 other resistance genes (Table 3), confirming the identity and the specificity of the candidate gene as  
220 *AvrLep2*.

### 221 **Expression Analysis**

222 Previously generated RNA-Seq data with isolate v23.1.2, avirulent on Surpass 400 (Van de Wouw *et*  
223 *al.*, 2009), were used to compare the expression kinetics of Lmb\_jn3\_08343 with that of all  
224 previously cloned *L. maculans* avirulence genes, following inoculation of cotyledons of a susceptible  
225 cultivar (Dutreux *et al.*, 2018; Leontovyčová *et al.*, 2020). Lmb\_jn3\_08343 is highly expressed during  
226 cotyledon infection, with a peak of expression seven days after infection (dai) in BIOGER's controlled  
227 conditions, i.e. before symptoms develop. It is fully co-regulated with previously cloned avirulence  
228 genes, particularly with *AvrLm4-7*, *AvrLm5-9* and *AvrLm3* (Figure 7). Previously generated RNA-Seq  
229 data for the infection of the susceptible *B. napus* line Topas DH16516 by both v23.1.3 and 00-100  
230 (Haddadi *et al.*, 2015) was also examined to determine the expression patterns for both alleles of  
231 *AvrLep2*. Peak expression, measured as reads per kilobase of transcript per million mapped reads  
232 (RPKM), was observed at 4 dai for both v23.1.3 and 00-100, with *AvrLep2* having a similar expression  
233 to *AvrLm5-9* in both isolates (Supplementary Figure 5).

#### 234 **Adult Plant Tests**

235 After leaf infection and leaf spot development in the field, *L. maculans* grows systemically into the  
236 petioles and the stems before switching to necrotrophy and developing the stem canker symptom.  
237 To test the functionality of the *LepR2-AvrLep2* interaction during these later stages of plant infection,  
238 seedlings of Topas DH16516 and Topas-*LepR2* were inoculated with the control isolates v23.1.3 and  
239 00-100, as well as eight additional native *L. maculans* isolates that had previously been classified as  
240 being 'virulent' towards both *LepR2* and *RlmS* based on cotyledon pathotyping. Three of the isolates  
241 had deletions of *AvrLep2*, while the remaining five all contained intact *AvrLep2* alleles of either the  
242 v23.1.3 (A<sup>278</sup>) or 00-100 (G<sup>278</sup>) haplotype, based on whole-genome resequencing (Supplementary  
243 Table 9). After allowing the infections to proceed from the cotyledon into the stem, where the lesion  
244 development was allowed to proceed for 12 weeks post-inoculation, there was a visible difference  
245 amongst the isolates in internal infection of Topas-*LepR2*, despite all of them (except the avirulent  
246 control 00-100) produced virulent cotyledon interactions. All seven isolates carrying an intact  
247 *AvrLep2* allele produced significantly less internal infection in the Topas-*LepR2* plants than in the  
248 susceptible Topas DH16516 control plants (Mann-Whitney test, *P* values ranging from 0.028 to  
249 <0.0001) (Figure 8, Supplementary Table 9). Only one 'AvrLep2' isolate (AI397) was able to produce  
250 relatively high infection in Topas-*LepR2*. Further analysis of the *AvrLep2* allele for this isolate  
251 revealed a novel substitution (C<sup>56</sup> -> T<sup>56</sup>) unique amongst all sequenced isolates. In contrast, all three  
252 isolates which carried a deletion at the *AvrLep2* locus (B16-13, B18-10 and B18-11) produced high  
253 and identical levels of infection in both the control Topas DH16516 and Topas-*LepR2* lines.

254



## 255 **A posteriori control of the consistency of phenotypic data**

256 The sequenced reference isolate v23.1.3 had been shared between laboratories but here,  
257 interaction phenotypes of v23.1.3 inoculated on Topas-*LepR2* clearly differed between AAFC and  
258 BIOGER experiments in spite of the use of the same Topas-*LepR2* seed lot. To resolve this difference,  
259 the two v23.1.3 lines maintained for years in parallel at AAFC and BIOGER were shared again and  
260 phenotyped on differential plant genotypes including Topas-*LepR2* at BIOGER. The interaction  
261 phenotypes of the two clonal isolates on Topas-*LepR2* were identical, with a clear resistance  
262 response compared to virulent control isolates (Supplementary Figure 6). In addition, the two  
263 isolates behaved similarly on all other plant genotypes including those containing resistance genes  
264 *Rlm1* or *Rlm4*, matching *AvrLm1* and *AvrLm4-7* present in v23.1.3. This suggests that only  
265 environmental conditions or experimental parameters, not genetic drift after independent  
266 subculturing of the isolate in the two laboratories, explain the difference in the phenotypic  
267 expression of the *LepR2* /*AvrLmS-AvrLep2* interaction.

268

269

## 270 **DISCUSSION**

271 In search of the avirulence genes matching *RlmS* in Surpass 400 and *LepR2* in Topas-*LepR2*, (i.e.,  
272 *AvrLmS* and *AvrLep2*, respectively) we report here on the independent cloning by two teams of the  
273 same avirulence gene, in spite of clear divergent interpretations of the interaction phenotypes  
274 observed on resistant plant genotypes between the two laboratories. Cloning *AvrLmS* is the first  
275 example of applying the BSS strategy to clone a gene of interest from *L. maculans*. BSS is a powerful  
276 approach to rapidly identify candidate genes not only in plant species (Klein *et al.*, 2018, Dong *et al.*,  
277 2018) but also in fungi (Lenhart *et al.*, 2019; Hu *et al.*, 2015). Here, we validated BSS on the  
278 previously cloned *AvrLm4-7* gene and our cloning of *AvrLmS* indicates that small-sized bulks  
279 containing only ~10 isolates are sufficient to identify the genomic region containing the candidate  
280 gene. On the other hand *AvrLep2* was cloned using the conventional bi-parental mapping approach.  
281 Similar to all other *AvrLm* genes, *AvrLmS-AvrLep2* is located in an AT-rich genome environment,  
282 encodes for a small secreted protein rich in cysteines, and the gene is highly overexpressed at early  
283 stages of cotyledon infections. The gene was renamed here *AvrLmS-Lep2*.

284

285 The interaction phenotype of the reference isolate v23.1.3 on Topas-*LepR2* was interpreted as either  
286 an intermediate resistance phenotype, or a 'virulence' phenotype. Such intermediate phenotypes  
287 have been reported for this interaction in many studies. First, the phenotypic resistance response on

288 the *B. napus* cultivar Surpass 400 inoculated with avirulent *AvrLmS* isolates was described as  
289 intermediate, i.e. producing larger lesions than typical hypersensitive response (HR), and sometimes  
290 at the edge of virulence, depending on the environmental conditions or with time (Van de Wouw *et al.*,  
291 2009). On the plant side, the resistance in Surpass 400 was at first considered as monogenic,  
292 based on field assays in Australia (Li and Cowling, 2003) or genetic mapping (Yu *et al.* 2008), though  
293 later mapping with defined isolates under controlled conditions suggested the occurrence of two  
294 genes in Surpass 400 (named as *BLMR1* and *BLMR2*, Long *et al.*, 2011; or *LepR3* and *RlmS*, Larkan *et al.*,  
295 2013). The resistance gene *LepR2* in DH line AD49 was described as limiting, but not preventing,  
296 hyphal growth of avirulent isolates, along with restricting sporulation on the infected plant tissues  
297 (Yu *et al.*, 2005). In addition, following inoculation of a range of isolates, most of them (22 out of 32)  
298 were found to display large, non-sporulating lesions (scores between 3 and 6 on a 0-9 scale), while 8  
299 isolates only displayed typical HR (score <3) (Yu *et al.*, 2005). In the study by Yu *et al.* (2005) the two  
300 most virulent isolates on *LepR2* displayed scores between 6 and 6.5, but never reached the level of  
301 virulence observed on the susceptible genotypes (scores >7.5). This intermediate resistance  
302 phenotype was nevertheless correlated with the stem canker resistance (Yu *et al.*, 2005), suggesting  
303 it is sufficient to prevent *L. maculans* systemic growth in the leaves and stems. Similarly, *B. napus*  
304 plants harbouring the resistant gene *BLMR2* (*LepR2-RlmS*) derived from the Surpass 400 parent also  
305 showed intermediate resistance response at the cotyledon stage (Long *et al.*, 2011), and correlated  
306 with partial resistance response at the adult plant stage (Dandena *et al.*, 2019), while *BLMR1*,  
307 corresponding to *LepR3* (Dandena *et al.*, 2019), gave a strong and typical HR.

308 Consistent with these published data, such an intermediate resistant phenotype on Surpass 400 was  
309 also described here for either the avirulent parental isolate INV13.269 or the transgenic isolates  
310 complemented with the v23.1.3 allele of *AvrLmS*). The fluctuating intermediate phenotype resulting  
311 from *AvrLmS-RlmS* or *AvrLep2-LepR2* interaction could be attributed to sequence variation in the  
312 gene, with only deleted *AvrLmS-Lep2* alleles, like those found in isolate WT50 or all virulent progeny  
313 of cross #82, able to induce clear susceptibility symptoms on Surpass 400 or Topas-*LepR2*, while  
314 variations in nucleotide sequence of the gene could correspond to variable degrees of avirulence,  
315 ranging from strong resistance for isolate 00-100 to intermediate resistance (or 'virulence') in  
316 v23.1.3. However, no clear relationship between sequence variants and phenotype was observed  
317 amongst sequenced isolates. Alternatively, the variation in cotyledon phenotypes observed in AAFC  
318 tests may be due to the expression level of the gene in v23.1.3 and its progeny. *AvrLep2* is expressed  
319 at a lower level than some other *AVR*, and at a similar level to *AvrLm5-9*, another *AVR* gene which  
320 generally also elicits an intermediate resistance response (Ghanbarnia *et al.*, 2015) that can be  
321 challenging to identify through cotyledon phenotyping. Another hypothesis to explain the variable

322 expression of symptoms and contrasting interpretation of the interaction could be a strong influence  
323 of environmental conditions on the phenotypic outcome, resulting in an ‘intermediate virulence’  
324 phenotype in AAFC environmental conditions. Previous studies have shown the impact of  
325 temperature or humidity on the expression of some *AvrLm-Rlm* interactions (for example, Huang *et*  
326 *al.*, 2006). Consistent with that, the avirulent phenotype of v23.1.3 on Topas-*LepR2* observed at  
327 BIOGER was reproduced here under BIOGER’s conditions using seed lots and isolate used at AAFC.  
328 Importantly, regardless of the cotyledon phenotype, it was clearly shown that the presence of an  
329 *AvrLep2* allele in any isolate was sufficient to induce *LepR2* dependant resistance in the adult plant  
330 assay, with variable but significant reduction of stem necrosis, while a deletion of the *AvrLep2* gene  
331 always resulted in similar internal infection and stem lesion in the *LepR2* line as in the susceptible  
332 control (Figure 8).

333 In spite of divergent interpretation of the phenotypes, the use of crosses involving isolates with  
334 contrasting phenotypes on the resistant plant genotype allowed us to identify and validate  
335 Lmb\_jn3\_08343 as the matching avirulence gene. Both approaches involved crosses between  
336 isolates displaying differential phenotypes on Surpass 400 and/or Topas-*LepR2*, with either a highly  
337 susceptible X intermediate resistance combination (WT50 x INV13.269), or an intermediate  
338 ‘virulence’ X avirulence combination (v23.1.3 x 00-100) that finally targeted the same avirulence  
339 gene. Understanding the relationship between allelic variation and interaction phenotypes, and how  
340 environmental or experimental conditions, along with the effect of the plant genetic background,  
341 can modulate the outcome of the interaction should be further analysed in future work. Supported  
342 by our phenotypic data, we thus showed that the genes identified in Surpass 400 as *RlmS*, *LepR2* or  
343 *BLMR2* recognize the same effector protein and are likely the same resistance gene. The name  
344 *LepR2*, initially published in the literature, should be retained for the resistance gene, while the  
345 corresponding effector gene has now been renamed *AvrLmS-Lep2*. The different nomenclatures  
346 defining the *R* genes in Surpass 400 in the past have now been clarified through this study, with  
347 LepR3 interacting with *AvrLm1* and LepR2 interacting with *AvrLmS-Lep2*. This work illustrates a first  
348 step toward the standardization of the complex and divergent terminologies used to describe *L.*  
349 *maculans* – *Brassica* sp. interactions.

350

## 351 **EXPERIMENTAL PROCEDURES**

### 352 **Approach 1: Bulk Segregant Analysis**

#### 353 ***L. maculans* isolates and crosses**

354 To map *AvrLmS*, a segregating progeny population was built following an *in vitro* cross between  
355 isolate WT50, isolated in Australia in 2005 (van de Wouw *et al.*, 2009), and INV13.269, recovered in  
356 2013 in France. *In vitro* crosses and random ascospore progeny recovery were performed as  
357 previously established (Plissonneau *et al.*, 2016).

### 358 **Plant genotypes and inoculation tests**

359 Isolates were grown on 20% V8-agar medium to produce conidia. Conidia ( $10 \mu\text{L}$ ,  $10^7$  spores  $\text{mL}^{-1}$ )  
360 were inoculated onto wounded cotyledons of 10 to 12 10-days old seedlings per plant genotype. The  
361 following *B. napus* plant genotypes were used: Westar or Topas DH161516 (no *R* gene), 15-23-4-1  
362 (*Rlm7*), Pixel (*Rlm4*), Columbus (*Rlm1*, *Rlm3*), Darmor (*Rlm9*), Bristol (*Rlm2-Rlm9*), Darmor-MX (*Rlm6-*  
363 *Rlm9*), 15.22.5.1 (*Rlm3*) (Balesdent *et al.*, 2005), Topas-*LepR2* (*LepR2*; Larkan *et al.*, 2016) and  
364 Surpass 400 (*LepR3-RlmS*; Larkan *et al.*, 2013). Four different isolates were inoculated on each plant.  
365 Symptoms were scored two to three times between 12-21 dai, using a 1-6 scale, with scores 1-3 and  
366 4-6 corresponding to avirulent and virulent phenotypes, respectively (Balesdent *et al.*, 2005). To  
367 compare the interaction phenotypes of progeny isolates with those of parental isolates, the non  
368 parametric Kruskal-Wallis test was applied, with a *P* value threshold set up at 0.05, using XLSTAT  
369 Version 2013.4.03. The phenotypes of the progeny selected for BSS were confirmed in an  
370 independent inoculation test.

### 371 **DNA extraction and bulk preparation**

372 Isolates were grown on Fries liquid medium for seven days as previously established (Fudal *et al.*,  
373 2008). Mycelium was harvested by vacuum filtration, rinsed with sterile de-ionized water and freeze-  
374 dried. DNA was then extracted using the DNeasy Plant Mini Kit (Qiagen, Hilden, Germany) following  
375 manufacturer's instructions. DNA concentration was quantified using Qubit<sup>TM</sup> dsDNA BR Assay Kit  
376 (Invitrogen, Carlsbad, USA). For library preparation, each isolate sample was adjusted to 20 ng of  
377 DNA and pooled into six different bulks (Table 2). The final DNA concentration in the bulks was  
378 controlled similarly.

### 379 **Whole genome-sequencing**

380 Between 74 and 200 ng of DNA was taken from each sample to prepare the DNA library. The DNA  
381 library was prepared using the Illumina Nextera<sup>TM</sup> DNA Flex Library Prep Kit (Illumina Inc., San Diego,  
382 USA) according to the manufacturer's protocol. Whole genome sequencing was performed on each  
383 of the eight bulks using the Illumina Hi-Seq technology with 150 bp PE at Kinghorn Centre for Clinical  
384 Genomics (KCCG) Core Facility at the Garvan Institute of Medical Research (Darlinghurst, Australia).

### 385 **Read mapping and variant calling**

386 Quality trimming of reads was carried out using Trimmomatic 0.36 (Bolger *et al.*, 2014) with default  
387 parameters and the Nextera paired-end adapters provided with the software. Reads were mapped  
388 to the reference isolate v23.1.3 (GenBank BioProject: PRJEB24468, Assembly GCA\_900538235),  
389 using BWA 0.7.17 with the BWA-MEM algorithm (Li, 2013) and default parameters. Duplicates were  
390 removed using the Picard MarkDuplicates 2.8.1 (Picard Toolkit). Reads with mapping quality <20  
391 were filtered using SAMtools 1.8 (Li *et al.*, 2009). Variants were called using GATK HaplotypeCaller  
392 v3.6-0-g89b7209 (McKenna *et al.*, 2010) with default parameters. Paired bulked samples were  
393 extracted (Bulk 1/2, Bulk 3/4, Bulk 5/6) using VCFtools 0.1.15 (Danecek *et al.*, 2011) and variants  
394 with a phred-scaled quality score <30 were excluded. Indels were removed using GATK  
395 SelectVariants. The public reference genome repeat annotation was used to exclude SNPs occurring  
396 within repeats. SNPs that were heterozygous or monomorphic in parental isolates were also  
397 excluded. Finally, VCF files were converted to tabular format with GATK VariantsToTable.

#### 398 **QTL-seq and candidate SNP analysis**

399 QTL-seq of paired bulked segregants was carried out using the R package QTLseqr version 0.7.3  
400 (Mansfeld and Grumet 2018; Takagi *et al.*, 2013) with the QTL-seq approach (Takagi *et al.*, 2013). For  
401 SNP filtering settings, we used minTotalDepth = 100, maxTotalDepth = 800 and a minimum genotype  
402 quality of 99. Reference allele frequency was required to be  $\geq 0.2$  and  $\leq 0.8$ . Window size was set  
403 to  $5e^4$ . To complement this analysis, SNPs that segregate perfectly between *AvrLmS* (Bulk 1 and 2  
404 including the parent INV13.269) and *avrLmS* (Bulk 5 and 6 including the parent WT50) were  
405 identified as candidate SNPs. We consider a SNP as perfectly segregating if it is called as homozygous  
406 by GATK in all samples and the alleles differ between samples with *AvrLmS* and those with *avrLmS*.  
407 The candidate SNP positions were intersected with the gene annotation to identify candidate genes  
408 based on the presence of a candidate SNP in the gene sequence or in the 5kb upstream/downstream  
409 region. The candidate region was also queried for long terminal repeats (LTR) using RepeatMasker.  
410 The GC content in the candidate QTL region was analysed using seqinr 3.4 (Charif and Lobry 2007)  
411 and AT-rich regions were identified with OcculterCut 1.1 (Testa *et al.*, 2016).

#### 412 **Candidate gene analysis**

413 Gene presence/absence variation (PAV) analysis was performed on the *AvrLmS* candidate gene. To  
414 assess PAV, the SAMtools view utility was used (Li *et al.*, 2009). Per base coverage of the candidate  
415 gene and upstream and downstream regions was calculated using BEDTools 2.26.0 (Quinlan and Hall  
416 2010) and plotted with ggplot2 in R. To search for gene homology of the *AvrLmS* candidate gene, the  
417 full nucleotide sequence of the candidate gene was BLAST queried against the InterProScan

418 database website. The genomic region surrounding the candidate gene including 10 kb upstream  
419 and downstream regions was also queried using BLAST on the NCBI database website. Expression of  
420 *AvrLmS* was examined from infection time course data previously generated following inoculation of  
421 isolate v23.1.3 on the susceptible cv. Darmor-*bzh*, or from *in vitro* culture conditions (Dutreux *et al.*,  
422 2018; Leontovyčová *et al.*, 2020).

#### 423 **Functional validation of the candidate gene**

424 The *AvrLmS* candidate gene was amplified from genomic DNA of v23.1.3 (2537-bp fragment: 1049-  
425 pb upstream and 1062-bp downstream of the CDS) and cloned into the binary vector pPZPNat1 using  
426 Gibson assembly (New England Biolabs, Ipswich, USA). Plasmid was amplified in *Escherichia coli*  
427 TOP10 cells, re-extracted and checked by sequencing (Eurofins Genomics, Ebersberg, Germany). The  
428 construct was introduced into *Agrobacterium tumefaciens* strain C58 by electroporation at 1.5 kV,  
429 200 ohms and 25 IF and used for transformation of two virulent isolates, WT50 and X82.14, as  
430 described by Gout *et al.* (2006). Fungal transformants were selected on 50 µg mL<sup>-1</sup> nourseothricin  
431 (WERNER BioAgents, Jena, Germany), purified by single pycnidium isolation and maintained on  
432 selective medium. 21 and 7 independent transformants were recovered for WT50 and X82.14,  
433 respectively. To control the deletion of the candidate gene in WT50 and in virulent progeny, the  
434 primers *AvrLms-up* (GACTGCAACACCTCTTTTCCA) and *AvrLms-low* (CGCTCGATCCGTCCCTTATA) were  
435 used on genomic DNA using standard PCR procedures and an annealing temperature of 60°C.

#### 436 **Approach 2: Map-based cloning**

##### 437 **Phenotyping of mapping population**

438 For mapping *AvrLep2*, a F<sub>1</sub> population produced from the parental isolates v23.1.3 and 00-100,  
439 previously used to map the *AvrLm5-9* locus (Ghanbarnia *et al.*, 2018) was also shown to be  
440 segregating for the *AvrLep2* phenotype under the controlled growth chamber conditions used at  
441 AAFC Saskatoon (Larkan *et al.*, 2013). The *B. napus* line Topas-*LepR2* (Larkan *et al.*, 2016) and the  
442 *LepR2* line 1135 (Yu *et al.*, 2009) were used to determine the phenotypic response of the parental  
443 isolates and progeny to *LepR2*. *B. napus* cotyledons were inoculated as described previously (Chen  
444 and Fernando 2006). Each *L. maculans* isolate was tested on 12 seedlings of the differential lines and  
445 12 seedlings of Topas as susceptible control. The disease reactions were scored 14 dai and rated  
446 using the 0-9 scale described by Williams (1985). Paired-end Illumina sequencing and assembly of  
447 parental isolates was previously described by Ghanbarnia *et al.* (2015).

##### 448 **Expression analysis by RNA-Seq**

449 Expression of *AvrLep2* was examined from infection time course data previously generated (Haddadi  
450 et al., 2016). Briefly, cotyledons of 7-day-old Topas DH16516 seedlings were inoculated with the  
451 parental isolates 00-100 and v23.1.3. Mock inoculation with water served as a negative control.  
452 Cotyledon discs 6 mm in diameter were excised from the infected cotyledons (four biological  
453 replicates) at 2, 4, 6 and 8 dai. RNA was extracted and sequence reads (100 bp paired-end) were  
454 generated with Illumina TruSeq high output version 3 chemistry on a HiSeq 2500 (Illumina, Inc.) at  
455 NRC-Plant Biotechnology Institute (NRC-PBI), Saskatoon, Canada.

#### 456 **Mapping, cloning and transformation of candidate gene**

457 SNPs for primer development were selected based on whole genomic comparison of parental  
458 isolates or based on predicted polymorphic effectors from isolate 00-100 and v23.1.3 using CLC  
459 Genomic Workbench (version 8.1.1, CLC Bio; Denmark). Then the target SNP(s) were used to design  
460 the KASP primers using the PrimerPicker software provided by KBioscience  
461 (<http://www.kbioscience.co.uk/>). KASP reactions were performed as per the manufacturer's  
462 instructions (LGC Biosearch; <https://www.biosearchtech.com>). One hundred F<sub>1</sub> progeny were  
463 selected in order to screen KASP markers spanning the whole *L. maculans* genome (Rouxel *et al.*,  
464 2011). A linkage map of *AvrLep2* was constructed using MAP function of QTL IciMapping v3.2  
465 software (Li *et al.*, 2008). Minimum LOD (logs of the odds ratios of linkage vs. no linkage) scores of  
466 6.0 (maximum recombination fraction of 0.6) were used to group loci. After initial linkage between  
467 markers and the *AvrLep2* locus was established, additional KASP markers targeted to the *AvrLep2*  
468 interval were designed based on genomic polymorphisms to enrich the map. Cloning, transformation  
469 and functional validation of *AvrLep2* SNP variants was performed as described previously  
470 (Ghanbarnia *et al.*, 2015). For functional validation two constructions were produced. First, the ORF  
471 for *AvrLep2* candidate gene (426 bp) was amplified and transferred to the fungal transformation  
472 vector pLM4 (Ghanbarnia *et al.*, 2015) under the control of the *AvrLm1* promoter. In addition, an  
473 *AvrLep2* candidate gene amplicon, including the native promoter region (starting from 1996 bp  
474 upstream of the ATG start codon based on the v23.1.3 reference sequence) and 186 bp downstream  
475 of the predicted ORF (total length 2609 bp), from the *AvrLep2* parental isolate 00-100 was  
476 transferred into the fungal transformation vector pNL11 (Larkan *et al.*, 2013). To confirm the  
477 *AvrLep2* specificity, phenotypic response of the parental isolates and positive transformants  
478 (showing restored phenotypic reaction on Topas-*LepR2*) were tested using the following *B. napus*  
479 differential lines; Topas-*Rlm1*, Topas-*Rlm2*, Topas-*Rlm4*, Topas-*LepR1*, Quantum (*Rlm3*), Roxet  
480 (*Rlm7*), Goéland (*Rlm9*) and the *B. juncea* line Vulcan-1S (*Rlm6*) (Larkan *et al.*, 2016). Topas DH16516  
481 (no R genes) was used as a positive control for infection by *L. maculans*.

## 482 **Adult plant tests**

483 Isolates carrying different alleles of *AvrLep2* (v23.1.3-type, 00-100-type or deletion, as well as one  
484 unique mutation) and previously classified as ‘virulent’ towards both *LepR2* (Topas-*LepR2* line) and  
485 *RlmS* (72-1; a F3 progeny selected from the Topas DH16516 x Surpass 400 population (Larkan et al.,  
486 2013) which retains *RlmS* resistance but lacks *LepR3*) were used to infect Topas DH16516 and Topas-  
487 *LepR2* seedlings via standard cotyledon wounding method. The plants were maintained under  
488 controlled conditions (Haddadi *et al.*, 2019) and infection was allowed to progress into the stem  
489 (cotyledons were not removed). The resistance phenotype was scored in the adult plants via  
490 assessment of internal infection in the stem at 8-12 weeks post-infection. Stem infection was rated  
491 using a 0-10 scale, where each graduation corresponds to 10% of the internal cross-section showing  
492 infection damage. Results were plotted using the ggplot2 (Wickham, 2016) and reshape2 (Wickham,  
493 2007) packages in R 4.0.0 (R Core Team, 2020), run in RStudio v1.3.959.

494

## 495 **ACKNOWLEDGMENTS**

496 This research was funded by the French National Research Agency project AvirLep (ANR GPLA07-  
497 024C) and the Grains Research and Development Corporation. The Canadian researchers  
498 acknowledge the generous funding received through the Growing Forward 2 Research Program and  
499 SaskCanola. We thank Régine Delourme, Pascal Glory (INRAE, UMR IGEPP) and the CRB BRACYSOL  
500 for providing the Darmor-MX line and Ralph Lange (Alberta Innovates) for providing *L. maculans*  
501 isolate AI397.

## 502 **AUTHOR’S CONTRIBUTION**

503 TXN, KG, NJL, BO and ASE conducted the experiments; AS and PH performed bioinformatics analysis;  
504 TXN, AS, BO, KG, MHBo, NJL, MHBa and TR analysed the data; JB, TR, KG, NJL, MHBa, MHBo and TXN  
505 conceived the idea; JB, TR, and MHBa supervised the *AvrLmS* project, MHBo and WGDF supervised  
506 *AvrLep2* project; MHba coordinated the writing of the publication.

## 507 **REFERENCES**

- 508 Balesdent, M.H., Barbetti, M.J., Li, H., Sivasithamparam, K., Gout, L. and Rouxel, T. (2005) Analysis of  
509 *Leptosphaeria maculans* race structure in a worldwide collection of isolates. *Phytopathology*,  
510 95, 1061-1071.
- 511 Balesdent, M.H., Fudal, I., Ollivier, B., Bally, P., Grandaubert, J., Eber, F., Chèvre, A.M. *et al.* (2013)  
512 The dispensable chromosome of *Leptosphaeria maculans* shelters an effector gene  
513 conferring avirulence towards *Brassica rapa*. *New Phytologist*, 198, 887-898.



- 514 Bolger, A.M., Lohse, M. and Usadel, B. (2014) Trimmomatic: a flexible trimmer for Illumina sequence  
515 data. *Bioinformatics*, 30, 2114-2120.
- 516 Charif, D. and Lobry, J.R. (2007) SeqinR 1.0-2: A contributed package to the R project for statistical  
517 computing devoted to biological sequences retrieval and analysis. In: Bastolla U, Porto M,  
518 Roman HE, Vendruscolo M (eds) Structural Approaches to Sequence Evolution: Molecules,  
519 Networks, Populations. Springer Berlin Heidelberg, Berlin, Heidelberg, pp 207-232.  
520 doi:10.1007/978-3-540-35306-5\_10.
- 521 Chen, Y. and Fernando, W.G.D. (2006) Prevalence of pathogenicity groups of *Leptosphaeria*  
522 *maculans* in Western Canada and North Dakota, USA. *Canadian Journal of Plant*  
523 *Pathology*, 28, 533-539.
- 524 Crouch, J.H., Lewis, B.G. and Mithen, R.F. (1994). The effect of A genome substitution on the  
525 resistance of *Brassica napus* to infection by *Leptosphaeria maculans*. *Plant Breeding*, 112,  
526 265-278.
- 527 Dandena, H.B., Zhang, Q., Zhou, T., Hirani, A. H., Liu, Z., Fernando, D.W.G., Duncan, R.W. *et al.*  
528 (2019). Analysis of quantitative adult plant resistance to blackleg in *Brassica napus*.  
529 *Molecular Breeding* 39, 124. <https://doi.org/10.1007/s11032-019-1035-y>.
- 530 Danecek, P., Auton, A., Abecasis, G., Albers, C.A., Banks, E., DePristo, M.A., Handsaker, R.E., *et al.*  
531 (2011) The variant call format and VCFtools. *Bioinformatics*, 27, 2156-2158.
- 532 Delourme, R., Chèvre, A.M., Brun, H., Rouxel, T., Balesdent, M.H., Dias, J.S., Salisbury, P. *et al.* (2006)  
533 Major gene and polygenic resistance to *Leptosphaeria maculans* in oilseed rape (*Brassica*  
534 *napus*). *European Journal of Plant Pathology*, 114, 41-52.
- 535 Delourme, R., Pilet-Nayel, M.L., Archipiano, M., Horvais, R., Tanguy, X., Rouxel, T., Brun, H., *et al.*  
536 (2004) A cluster of major specific resistance genes to *Leptosphaeria maculans* in *Brassica*  
537 *napus*. *Phytopathology*, 94, 578-583.
- 538 Dong, W., Wu, D., Li, G., Wu, D. and Wang, Z. (2018) Next-generation sequencing from bulked  
539 segregant analysis identifies a dwarfism gene in watermelon. *Scientific Reports*, 8(1), 2908.  
540 doi:10.1038/s41598-018-21293-1
- 541 Dutreux, F., Da Silva, C., d'Agata, L., Couloux, A., Gay, E., Istace, B., Lapalu, N. *et al* (2018) De novo  
542 assembly and annotation of three *Leptosphaeria* genomes using Oxford Nanopore MinION  
543 sequencing. *Scientific Data*, 5 (180235), 11 p. , DOI : 10.1038/sdata.2018.235

- 544 Fitt, B.D.L., Brun, H., Barbetti, M.J. and Rimmer, S.R. (2006) World-wide importance of phoma stem  
545 canker (*Leptosphaeria maculans* and *L. biglobosa*) on oilseed rape (*Brassica napus*).  
546 *European Journal of Plant Pathology*, 114, 3-15.
- 547 Fudal, I., Ross, S., Gout, L., Blaise, F., Kuhn, M.L., Eckert, M.R., Cattolico L. *et al.* (2007)  
548 Heterochromatin-like regions as ecological niches for avirulence genes in the *Leptosphaeria*  
549 *maculans* genome: map-based cloning of *AvrLm6*. *Molecular Plant-Microbe Interaction*, 20,  
550 459-470.
- 551 Ghanbarnia, K., Fudal, I., Larkan, N.J., Links, M.G., Balesdent, M.H., Profotova, B., Fernando, D.W.G.  
552 *et al.* (2015) Rapid identification of the *Leptosphaeria maculans* avirulence gene *AvrLm2*  
553 using an intraspecific comparative genomics approach. *Molecular Plant Pathology*, 16, 699-  
554 709.
- 555 Ghanbarnia, K., Ma, L., Larkan, N.J., Haddadi, P., Fernando, D.W.G. and Borhan, M.H. (2018)  
556 *Leptosphaeria maculans AvrLm9*: a new player in the game of hide and seek with *AvrLm4-7*.  
557 *Molecular Plant Pathology*, 19, 1754-1764.
- 558 Gout, L., Fudal, I., Kuhn, M.L., Blaise, F., Eckert, M., Cattolico, L., Balesdent M.H. *et al.* (2006) Lost in  
559 the middle of nowhere: the *AvrLm1* avirulence gene of the Dothideomycete *Leptosphaeria*  
560 *maculans*. *Molecular Microbiology*, 60, 67-80.
- 561 Haddadi, P., Larkan, N.J. and Borhan, M.H. (2019) Dissecting *R* gene and host genetic background  
562 effect on the *Brassica napus* defense response to *Leptosphaeria maculans*. *Scientific Reports*,  
563 9, 6947 <https://doi.org/10.1038/s41598-019-43419-9>.
- 564 Haddadi, P., Ma, L., Wang, H. and Borhan, M.H. (2016) Genome-wide transcriptomic analyses  
565 provide insights into the lifestyle transition and effector repertoire of *Leptosphaeria*  
566 *maculans* during the colonization of *Brassica napus* seedlings. *Molecular Plant Pathology*, 17,  
567 1196-1210.
- 568 Hu, W., Suo, F. and Du, L.L. (2015) Bulk segregant analysis reveals the genetic basis of a natural trait  
569 variation in fission yeast. *Genome Biology and Evolution*, 7, 3496-3510.  
570 doi:10.1093/gbe/evv238.
- 571 Huang, Y.J.; Evans, N., Li, Z.Q., Eckert, M., Chèvre, A.M., Renard, M. and Fitt, B.D.L. (2006)  
572 Temperature and leaf wetness duration affect phenotypic expression of *Rlm6*-mediated  
573 resistance to *Leptosphaeria maculans* in *Brassica napus*. *New Phytologist*, 170, 129-141.
- 574 Klein, H., Xiao, Y., Conklin, P. A., Govindarajulu, R., Kelly, J. A., Scanlon, M. J., Whipple, C. J. *et al.*  
575 (2018). Bulk-Segregant Analysis Coupled to Whole Genome Sequencing (BSA-Seq) for  
576 Rapid Gene Cloning in Maize. *G3: Genes/Genomes/Genetics*, 8(11), 3583.  
577 doi:10.1534/g3.118.200499

- 578 Larkan, N.J., Lydiate, D.J., Parkin, I.A., Nelson, M.N., Epp, D.J., Cowling, W.A., Rimmer, S.R. *et al.*  
579 (2013) The *Brassica napus* blackleg resistance gene *LepR3* encodes a receptor-like protein  
580 triggered by the *Leptosphaeria maculans* effector AVR1M1. *New Phytologist*, 197, 595-605.
- 581 Larkan, N.J., Ma, L. and Borhan, H. (2015) The *Brassica napus* receptor-like protein RLM2 is encoded  
582 by a second allele of the *LepR3/Rlm2* blackleg resistance locus. *Plant Biotechnology Journal*,  
583 13, 983-992.
- 584 Larkan, N.J., Yu, F., Lydiate, D.J., Rimmer, S.R. and Borhan, M.H. (2016) Single *R* gene introgression  
585 lines for accurate dissection of the *Brassica* - *Leptosphaeria* pathosystem. *Frontiers in Plant*  
586 *Sciences*, 7, 1771.
- 587 Lenhart, B. A., Meeks, B. and Murphy, H. A. (2019) Variation in filamentous growth and response to  
588 quorum-sensing compounds in environmental isolates of *Saccharomyces cerevisiae*. *G3:*  
589 *Genes/Genomes/Genetics*, 9(5), 1533. doi:10.1534/g3.119.400080.
- 590 Leontovyčová, H., Trdá, L., Dobrev, P.I., Šašek, V., Gay, L., Balesdent M.H. and Burketová L. (2020)  
591 Auxin biosynthesis in the phytopathogenic fungus *Leptosphaeria maculans* is associated with  
592 enhanced transcription of indole-3-pyruvate decarboxylase LmIPDC2 and tryptophan  
593 aminotransferase LmTAM1. *Research in Microbiology*, 171, 174-184  
594 <https://doi.org/10.1016/j.resmic.2020.05.001>.
- 595 Li, C.X. and Cowling, W.A. (2003). Identification of a single dominant allele for resistance to blackleg  
596 in *Brassica napus* 'Surpass 400'. *Plant Breeding*, 122, 485-488.
- 597 Li, H. (2013) Aligning sequence reads, clone sequences and assembly contigs with BWA-MEM. arXiv  
598 preprint arXiv:1303.3997.
- 599 Li, H., Damour, L., Sivasithamparam, K. and Barbetti, M.J. (2004) Increased virulence and  
600 physiological specialisation among Western Australian isolates of *Leptosphaeria maculans*  
601 breaking down existing single dominant gene-based resistance in six cultivars of *Brassica*  
602 *napus*. *Brassica* 6, 1-6.
- 603 Li, H., Handsaker, B., Wysoker, A., Fennell, T., Ruan, J., Homer, N., Marth, G., *et al.* (2009) The  
604 Sequence Alignment/Map format and SAMtools. *Bioinformatics*, 25, 2078-2079.  
605 doi:10.1093/bioinformatics/btp352.
- 606 Li, H., Ribaut, J.M., Li, Z. and Wang, J. (2008) Inclusive composite interval mapping (ICIM) for digenic  
607 epistasis of quantitative traits in biparental populations. *Theoretical and Applied Genetics*  
608 116, 243-60.
- 609 Long, Y., Wang, Z., Sun, Z., Fernando, D.W.G., McVetty, P.B.E. and Li, G. (2011) Identification of two  
610 blackleg resistance genes and fine mapping of one of these two genes in a *Brassica napus*  
611 cultivar 'Surpass 400'. *Theoretical and Applied Genetics*, 122, 1223-1231.

- 612 Mansfeld, B. and Grumet, R. (2018) QTLseqr: An R Package for Bulk Segregant Analysis with Next-  
613 Generation Sequencing. *Plant Genome*, 11, 180006. doi:10.3835/plantgenome2018.01.0006.
- 614 McKenna, A.H., Hanna, M., Banks, E., Sivachenko, A., Cibulskis, K., Kernytsky, A., Garimella, K. *et al.*  
615 (2010) The Genome Analysis Toolkit: A MapReduce framework for analyzing next-generation  
616 DNA sequencing data. *Genome Research*, 20, 1297-1303. doi:10.1101/gr.107524.110.
- 617 Parlange, F., Daverdin, G., Fudal, I., Kuhn, M.L., Balesdent, M.H., Blaise, F., Grezes-Besset, B. *et al.*  
618 (2009) *Leptosphaeria maculans* avirulence gene *AvrLm4-7* confers a dual recognition  
619 specificity by the *Rlm4* and *Rlm7* resistance genes of oilseed rape, and circumvents *Rlm4*-  
620 mediated recognition through a single amino acid change. *Molecular Microbiology*, 71, 851-  
621 63.
- 622 Petersen, T.N., Brunak, S., von Heijne, G. and Nielsen, H. (2011) SignalP 4.0: discriminating signal  
623 peptides from transmembrane regions. *Nature Methods*, 8, 785-786.
- 624 Petit-Houdenot, Y., Degrave, A., Meyer, M., Blaise, F., Ollivier, B., Marais, C-L., Jauneau, A. *et al.*  
625 (2019) A two genes-for-one gene interaction between *Leptosphaeria maculans* and *Brassica*  
626 *napus*. *New Phytologist*, 223, 397-411.
- 627 Picard Toolkit (2019) Broad Institute, GitHub Repository. <http://broadinstitute.github.io/picard/>;  
628 Broad Institute.
- 629 Plissonneau, C., Daverdin, G., Ollivier, B., Blaise, F., Degrave, A., Fudal, I., Rouxel, T. *et al.* (2016) A  
630 game of hide and seek between avirulence genes *AvrLm4-7* and *AvrLm3* in *Leptosphaeria*  
631 *maculans*. *New Phytologist*, 209, 1613-1624.
- 632 Quinlan, A.R. and Hall, I.M. (2010) BEDTools: a flexible suite of utilities for comparing genomic  
633 features. *Bioinformatics*, 26, 841-842. doi:10.1093/bioinformatics/btq033.
- 634 R Core Team (2020). R: A language and environment for statistical computing. R Foundation for  
635 Statistical Computing, Vienna, Austria. URL <https://www.R-project.org/>.
- 636 Rimmer, S.R. (2006) Resistance genes to *Leptosphaeria maculans* in *Brassica napus*. *Canadian*  
637 *Journal of Plant Pathology*, 28, S288-S297.
- 638 Rouxel, T., Grandaubert, J., Hane, J.K., Hoede, C., van de Wouw, A.P., Couloux, A., Dominguez, V. *et*  
639 *al.* (2011) Effector diversification within compartments of the *Leptosphaeria maculans*  
640 genome affected by Repeat-Induced Point mutations. *Nature Communication*, 2, 202.
- 641 Sprague, S.J., Marcroft, S.J., Hayden, H.L. and Howlett, B.J. (2006) Major gene resistance to blackleg  
642 in *Brassica napus* overcome within three years of commercial production in southeastern  
643 Australia. *Plant Disease*, 90, 190-198.

- 644 Takagi, H., Abe, A., Yoshida, K., Kosugi, S., Natsume, S., Mitsuoka, C., Uemura, A. *et al.* (2013) QTL-  
645 seq: rapid mapping of quantitative trait loci in rice by whole genome resequencing of DNA  
646 from two bulked populations. *Plant Journal*, 74, 174-183.
- 647 Testa, A.C., Oliver, R.P. and Hane, J.K. (2016) OcculterCut: A comprehensive survey of AT-rich regions  
648 in fungal genomes. *Genome Biology and Evolution*, 8, 2044-2064.
- 649 Van de Wouw, A.P., Lowe, R.G.T., Elliott, C.E., Dubois, D.J. and Howlett, B.J. (2014) An avirulence  
650 gene, *AvrLmJ1*, from the blackleg fungus, *Leptosphaeria maculans*, confers avirulence to  
651 *Brassica juncea* cultivars. *Molecular Plant Pathology*, 15, 523-530.
- 652 Van de Wouw, A.P., Marcroft, S.J., Barbetti, M.J., Hua, L., Salisbury, P.A., Gout, L., Rouxel, T. *et al.*  
653 (2009) Dual control of avirulence in *Leptosphaeria maculans* towards a *Brassica napus*  
654 cultivar with 'sylvestris-derived' resistance suggests involvement of two resistance genes.  
655 *Plant Pathology*, 58, 305-313.
- 656 Wickham, H. (2007) Reshaping Data with the reshape Package. *Journal of Statistical Software*, 21, 1–  
657 20. <http://www.jstatsoft.org/v21/i12/>.
- 658 Wickham, H. (2016) *ggplot2: Elegant Graphics for Data Analysis*. Springer-Verlag New York. ISBN  
659 978-3-319-24277-4, <https://ggplot2.tidyverse.org>.
- 660 Williams, P.H. (1985) Crucifer genetics cooperative. *Plant Molecular Biology Reporter*, 3, 129–144.
- 661 Yu, F., Gugel, R.K., Kutcher, Peng, G and Rimmer, S.R. (2013) Identification and mapping of a novel  
662 blackleg resistance locus *LepR4* in the progenies from *Brassica napus* X *B. rapa* subsp.  
663 *sylvestris*. *Theoretical and Applied Genetics*, 126, 307-315.
- 664 Yu, F., Lydiate, D.J. and Rimmer, S.R. (2005) Identification of two novel genes for blackleg resistance  
665 in *Brassica napus*. *Theoretical and Applied Genetics*, 110, 969-79.
- 666 Yu, F., Lydiate, D.J. and Rimmer, S.R. (2008) Identification and mapping of a third blackleg resistance  
667 locus in *Brassica napus* derived from *B. rapa* subsp. *sylvestris*. *Genome*, 51, 64-72.

668

## 669 SUPPORTING INFORMATION LEGENDS

670 **Supplementary Table 1.** Read mapping statistics obtained from library preparation of six individual  
671 bulk samples (samples 1-6) and parental isolates (samples 7 and 8).

672 **Supplementary Table 2.** Single nucleotide polymorphisms (SNPs) found in six bulked progeny. SNPs  
673 that were monomorphic, not homozygous in both parents, or that occurred in repetitive regions  
674 were excluded.

675 **Supplementary Table 3.** QTL-Seq analysis results for Bulk 3/4, showing QTL peaks passing the 99%  
676 confidence threshold and supported by >3 SNPs.

677 **Supplementary Table 4.** Merged QTL-Seq analysis results for all bulked progeny. Neighboring QTL  
678 within 30kb were merged.

679 **Supplementary Table 5.** QTL-Seq analysis results for Bulk 1/2, showing QTL peaks passing the 99%  
680 confidence threshold and supported by >3 SNPs.

681 **Supplementary Table 6.** QTL-Seq analysis results for Bulk 5/6, showing QTL peaks passing the 99%  
682 confidence threshold and supported by >3 SNPs.

683 **Supplementary Table 7.** AT-rich (R0) and GC-equilibrated (R1) regions on JN3 scaffold 9, identified  
684 by OcculterCut.

685 **Supplementary Table 8.** Allelic variation at the *AvrLep2* locus in a collection of 37 isolates virulent or  
686 avirulent towards *LepR2* and polymorphic sites in its protein.

687 **Supplementary Table 9.** Cotyledon and adult plant inoculation tests with virulent and avirulent  
688 isolates toward *LepR2*.

689 **Supplementary Figure 1.** Plot of  $\Delta(\text{SNP-index})$  between Bulk 3 and Bulk 4 (*AvrLm7* and *avrLm7*)  
690 across scaffold JN3\_SC03. Confidence intervals of 95% (blue) and 99% (red) are shown. QTL  
691 coordinates are provided in Supplementary Table 3.

692 **Supplementary Figure 2.** Plot of GC content calculated in 500 bp windows across scaffold 9. The grey  
693 region demarcates the candidate regions identified using QTL-Seq for Bulk 1/2 and Bulk 5/6. The Red  
694 line shows the CDS of the candidate gene *Lmb\_jn3\_08343*.

695 **Supplementary Figure 3.** Genomic location and characteristics of the *AvrLmS* (*Lmb\_jn3\_08343*) gene  
696 in *Leptosphaeria maculans*

697 **Supplementary Figure 4.** Nucleotide sequence of the 486 nucleotide region encoding *AvrLep2* from  
698 *L. maculans* isolate 00-100 and its predicted amino acid sequence.

699 **Supplementary Figure 5.** Comparison of *Avr* gene expression in *L. maculans* isolates v23.1.3 (A) and  
700 00-100 (B) during cotyledon infection of *B. napus* line Topas DH16156.

701 **Supplementary Figure 6.** Comparison of the pathogenicity of the two batches of v23.1.3 (JN3) from  
702 AAFC and from BIOGER.

703

704

705 **FIGURE LEGENDS**

706 **FIGURE 1** Plot of  $\Delta(\text{SNP-index})$  between Bulks differing for *AvrLmS* across scaffold JN3\_SC09. (a)  
707 Bulks 1/2 (*AvrLmS*) and (b) Bulks 5/6 (*AvrLmS*, *AvrLm7*). Confidence intervals of 95% (red) and 99%  
708 (blue) are shown. QTL coordinates are provided in Supplementary Tables 5 and 6.

709 **FIGURE 2** Identification of the candidate region for *AvrLmS* by bulked segregant sequencing. (a) Per  
710 base coverage for all samples (not including Bulk 3 and 4, *AvrLm7* and *avrLm7* respectively) for 20kb  
711 upstream and downstream of the gene *Lmb\_jn3\_08343* (coding sequence demarcated with grey  
712 vertical bar) on scaffold 9 (JN3\_SC09). Samples with *AvrLmS* are shown in green and those with  
713 *avrLmS* in purple. Y-axis limit was set to 400. (b) Circos plot of  $\Delta(\text{SNP-index})$  between Bulk 1/2 with  
714 *AvrLmS* (outer circle) and Bulk 5/6 with *AvrLmS+AvrLm7* (inner circle) for the 19 scaffolds larger than  
715 1Mb. Confidence intervals of 99% (red) are shown. The y-axis is bounded from -0.5 to 0.8 for the  
716 outer plots and from -0.9 to 0.9 for the inner plots. The shared QTL for *AvrLmS* is located on scaffold  
717 9. Coordinates for QTL are provided in Supplementary Tables S5 and S6.

718 **FIGURE 3** Genetic and physical maps of the *AvrLep2* genomic region in *Leptosphaeria maculans*  
719 isolate v23.1.3. (a) Position of *AvrLep2* relative to KASP markers on '00-100 x v23.1.3' (SuperContig 3  
720 from v23.1.3 V1 assembly GCF\_000230375.1) map. (b) Physical region spanning the *AvrLep2* locus in  
721 the isolate v23.1.3. The top lane denotes predicted genes, bottom lane shows cumulative gene  
722 expression level for predicted *L. maculans* genes during infection time course (2-8 dpi).

723 **FIGURE 4** Box plot of rating scores of interaction phenotypes between wild-type or transformed  
724 isolates of *Leptosphaeria maculans* and four *Brassica napus* genotypes. From top to bottom:  
725 susceptible check Bristol (*Rlm2-Rlm9*), Surpass 400 (*LepR3-RlmS*), Topas DH16516 (no R gene),  
726 Topas-*LepR2* (*LepR2*). For each box, the red cross indicates the score mean; the black horizontal line,  
727 the score median, the rectangles comprise 75% (Q1-Q3) of the rating scores. Wild type isolates are in  
728 bold; X82.14-i and WT50-j are five and six independent transformed isolates of X82.14 and WT50,  
729 respectively, with the candidate gene *Lmb\_jn3\_08343*.

730 **FIGURE 5** Examples of interaction phenotypes of wild-type and transformed isolates with the *AvrLmS*  
731 candidate gene on Topas DH16516, Topas-*LepR2* and Surpass 400. The four isolates inoculated on  
732 each plant are described on the up right panel. v23.1.3 and v23.1.2 are avirulent on Topas-*LepR2*  
733 and Surpass 400 and X82.14 is virulent. All other isolates are independent transformants issued from  
734 the complementation of X82.14 isolate with the *AvrLmS* candidate gene. Pictures are taken 15 days  
735 post inoculation under BIOGER's conditions.

736 **FIGURE 6** Phenotypic interaction of wild type and complemented *Leptosphaeria maculans* isolates  
737 on the cotyledons of control (Topas DH16516) and Topas-*LepR2* lines. Photographs of the infected  
738 cotyledons were taken 14 days post\_inoculation. v23.1.3:*AvrLep2* (AW1) is a transformant with  
739 pNL11-*AvrLep2* construct (*AvrLep2* avirulent allele coding region was amplified from isolate 00-100,  
740 driven its native promoter).

741 **FIGURE 7** Expression of Lmb\_jn3\_08343 upon infection of oilseed rape cotyledons. Expression  
742 kinetics of Lmb\_jn3\_08343 was compared to that of previously cloned *AvrLm* genes. RNA-Seq data  
743 were obtained for isolate v23.1.2 *in vitro* (Fries medium condition) and following infection of  
744 cotyledons of cv. Darmor-*bzh* at 2, 5, 7, 8, 12 and 15 days post infection (dpi). Values are RPKM.

745 **FIGURE 8** Box & Whisker Plot for internal infection of Topas DH16516 (red) and Topas-*LepR2* (blue)  
746 of adult plants by 10 *L. maculans* isolates. Data points (black dots) indicate internal infection (0-10  
747 scale) of individual plants (10 per test). Boxes denote interquartile range (Q<sub>1</sub> to Q<sub>3</sub>), black bars show  
748 median score and whiskers denote range of distribution. Data points outside the whiskers (< 1.5 Q<sub>3</sub>  
749 or >1.5 Q<sub>1</sub>) are considered outliers. Red-shaded panels indicate isolates for which *AvrLep2* is  
750 deleted.

751



752 **Table 1.** Segregation for virulence on *Rlm6*, *Rlm7* and *RlmS* (Surpass 400) in the *Leptosphaeria*  
 753 *maculans* cross X82 (WT50 x INV13.269)

|                                           | Interaction phenotype on          |                              |                                      | Number of isolates (%) |
|-------------------------------------------|-----------------------------------|------------------------------|--------------------------------------|------------------------|
|                                           | Darmor-MX<br>( <i>Rlm6-Rlm9</i> ) | 15.23.4.1<br>( <i>Rlm7</i> ) | Surpass 400<br>( <i>LepR3-RlmS</i> ) |                        |
| Parental isolates :                       |                                   |                              |                                      |                        |
| WT50                                      | V <sup>a</sup>                    | A                            | V                                    | na <sup>b</sup>        |
| INV13.269                                 | A                                 | V                            | A                                    | na                     |
| Phenotypic classes in                     |                                   |                              |                                      |                        |
| progeny isolates                          | A                                 | A                            | A                                    | 7 (8.3%)               |
|                                           | A                                 | A                            | V                                    | 11 (13.1%)             |
|                                           | A                                 | V                            | A                                    | 14 (16.7%)             |
|                                           | A                                 | V                            | V                                    | 6 (7.1%)               |
|                                           | V                                 | A                            | A                                    | 12 (14.3%)             |
|                                           | V                                 | A                            | V                                    | 12 (14.3%)             |
|                                           | V                                 | V                            | A                                    | 11 (13.1%)             |
|                                           | V                                 | V                            | V                                    | 11 (13.1%)             |
| A:V ratio ( <i>p</i> value <sup>c</sup> ) | 38:46 (0.383)                     | 42:42 (1)                    | 44:40 (0.663)                        | na                     |

754 <sup>a</sup> V, virulent phenotype; A, avirulent phenotype

755 <sup>b</sup> na, not applicable

756 <sup>c</sup> *P* value of the  $X^2$  test for a 50:50 segregation ratio

757

758

759 **Table 2.** Characteristics of DNA bulks and sequence mapping results

| <b>Bulk or sample No.</b> | <b>Bulk name (abbreviated name)</b> | <b>Type of isolate</b>                            | <b>No. of contributing isolates in the bulk</b> | <b>Nb of reads mapped to Lmb_jn3_08343</b> | <b>Fraction of Lmb_jn3_08343 bases covered by at least one read</b> |
|---------------------------|-------------------------------------|---------------------------------------------------|-------------------------------------------------|--------------------------------------------|---------------------------------------------------------------------|
| 1                         | <i>AvrLmS</i> (AS)                  | Progeny, avirulent on Surpass 400                 | 25                                              | 626                                        | 1.00                                                                |
| 2                         | <i>avrLmS</i> (aS)                  | Progeny, virulent on Surpass 400                  | 22                                              | 2                                          | 0.37                                                                |
| 3                         | <i>AvrLm7</i> (A7)                  | Progeny, avirulent on <i>Rlm7</i>                 | 24                                              | nd                                         | nd                                                                  |
| 4                         | <i>avrLm7</i> (a7)                  | Progeny, virulent on <i>Rlm7</i>                  | 23                                              | nd                                         | nd                                                                  |
| 5                         | <i>AvrLmS</i> + <i>AvrLm7</i> (AS7) | Progeny, avirulent on Surpass 400 and <i>Rlm7</i> | 11                                              | 809                                        | 1.00                                                                |
| 6                         | <i>avrLmS</i> + <i>avrLm7</i> (aS7) | Progeny, virulent on Surpass 400 and <i>Rlm7</i>  | 9                                               | 0                                          | 0.00                                                                |
| 7                         | INV13.269 (a7AS)                    | Parental isolate                                  | 1                                               | 1056                                       | 1.00                                                                |
| 8                         | WT50 (A7aS)                         | Parental isolate                                  | 1                                               | 1                                          | 0.03                                                                |

760

761

762

763 **Table 3.** Pathogenicity test for *L. maculans* isolates (wild-type and transformants) on *B. napus* lines carrying diverse blackleg *R* genes.

764

| Isolates/Transformants <sup>a</sup> | <i>B. napus</i> lines/cultivars and R gene content |                |                |                |                |             |             |             |                 |                 |                 |
|-------------------------------------|----------------------------------------------------|----------------|----------------|----------------|----------------|-------------|-------------|-------------|-----------------|-----------------|-----------------|
|                                     | Topas (T)                                          | T- <i>Rlm1</i> | T- <i>Rlm2</i> | T- <i>Rlm3</i> | T- <i>Rlm4</i> | Vulcan      | Roxet       | Goéland     | T- <i>LepR1</i> | T- <i>LepR2</i> | T- <i>LepR3</i> |
|                                     | <i>Control</i>                                     | <i>Rlm1</i>    | <i>Rlm2</i>    | <i>Rlm3</i>    | <i>Rlm4</i>    | <i>Rlm6</i> | <i>Rlm7</i> | <i>Rlm9</i> | <i>LepR1</i>    | <i>LepR2</i>    | <i>LepR3</i>    |
| v23.1.3                             | V <sup>b</sup>                                     | A              | V              | V              | A              | A           | A           | V           | A               | V               | A               |
| 00-100                              | V                                                  | V              | A              | A              | V              | A           | V           | A           | A               | A               | V               |
| v23.1.3: <i>AvrLep2</i> (AW1)       | V                                                  | A              | V              | V              | A              | A           | A           | V           | A               | A               | A               |
| v23.1.3: <i>AvrLep2</i> (AW2)       | V                                                  | A              | V              | V              | A              | A           | A           | V           | A               | A               | A               |

765

766 <sup>a</sup>v23.1.3: *AvrLep2* (AW1) is a transformant with pNL11-*AvrLep2* construct (*AvrLep2* avirulent allele was amplified from isolate 00-100 with native promotor);

767 v23.1.3: *AvrLep2* (AW2) is a transformant with pLM4-*AvrLep2* construct (*AvrLep2* avirulent allele coding region was amplified from isolate 00-100, driven by

768 *AvrLm1* promoter.

769 <sup>b</sup> Interactions classified as either virulent (V) or avirulent (A).

770

771

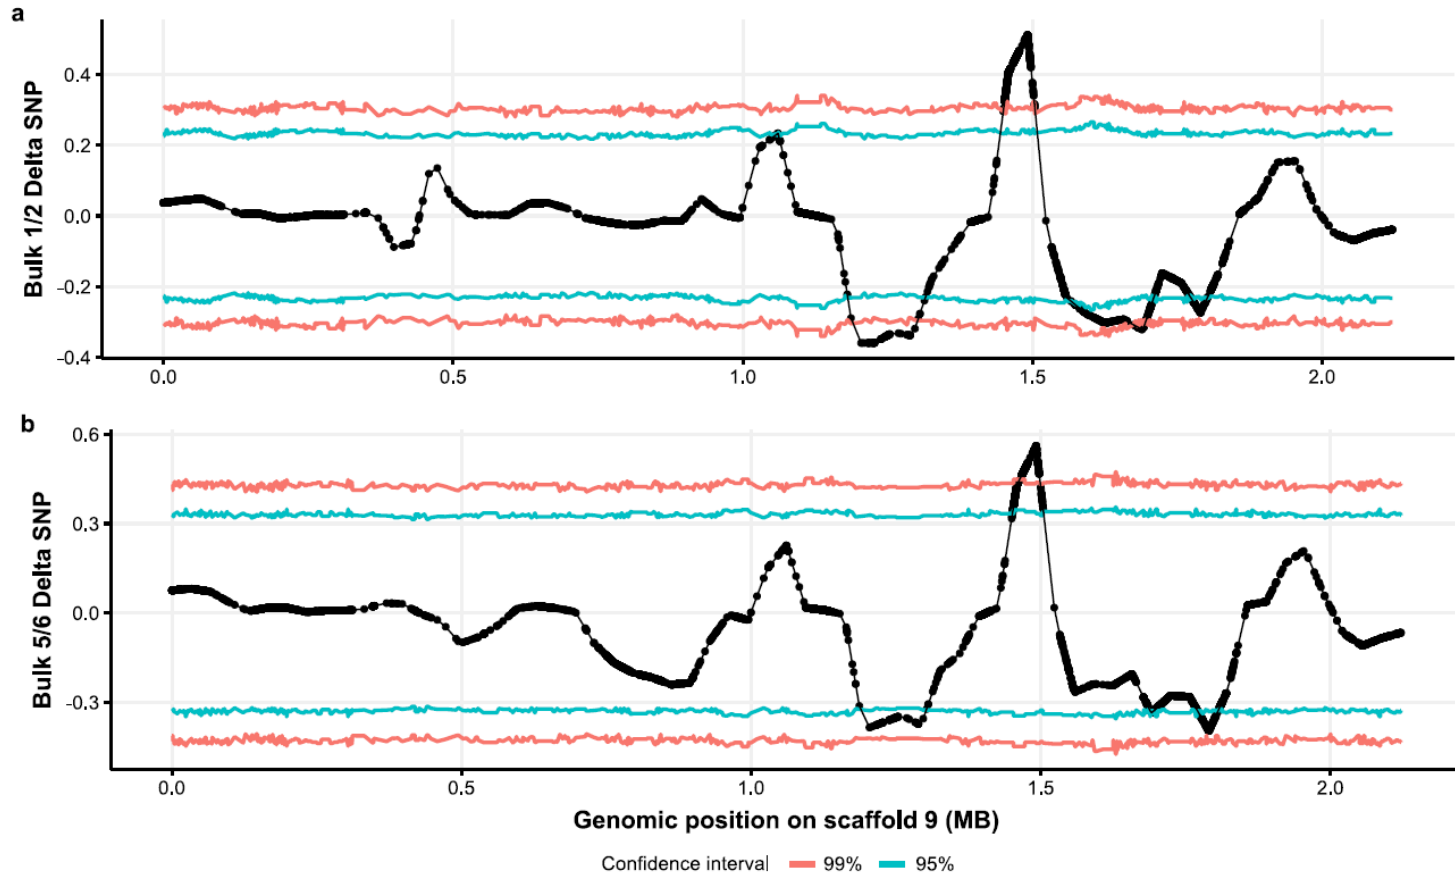

**FIGURE 1** Plot of  $\Delta(\text{SNP-index})$  between Bulks differing for *AvrLmS* across scaffold JN3\_SC09. (a) Bulks 1/2 (*AvrLmS*) and (b) Bulks 5/6 (*AvrLmS*, *AvrLm7*). Confidence intervals of 95% (red) and 99% (blue) are shown. QTL coordinates are provided in Supplementary Tables 5 and 6.

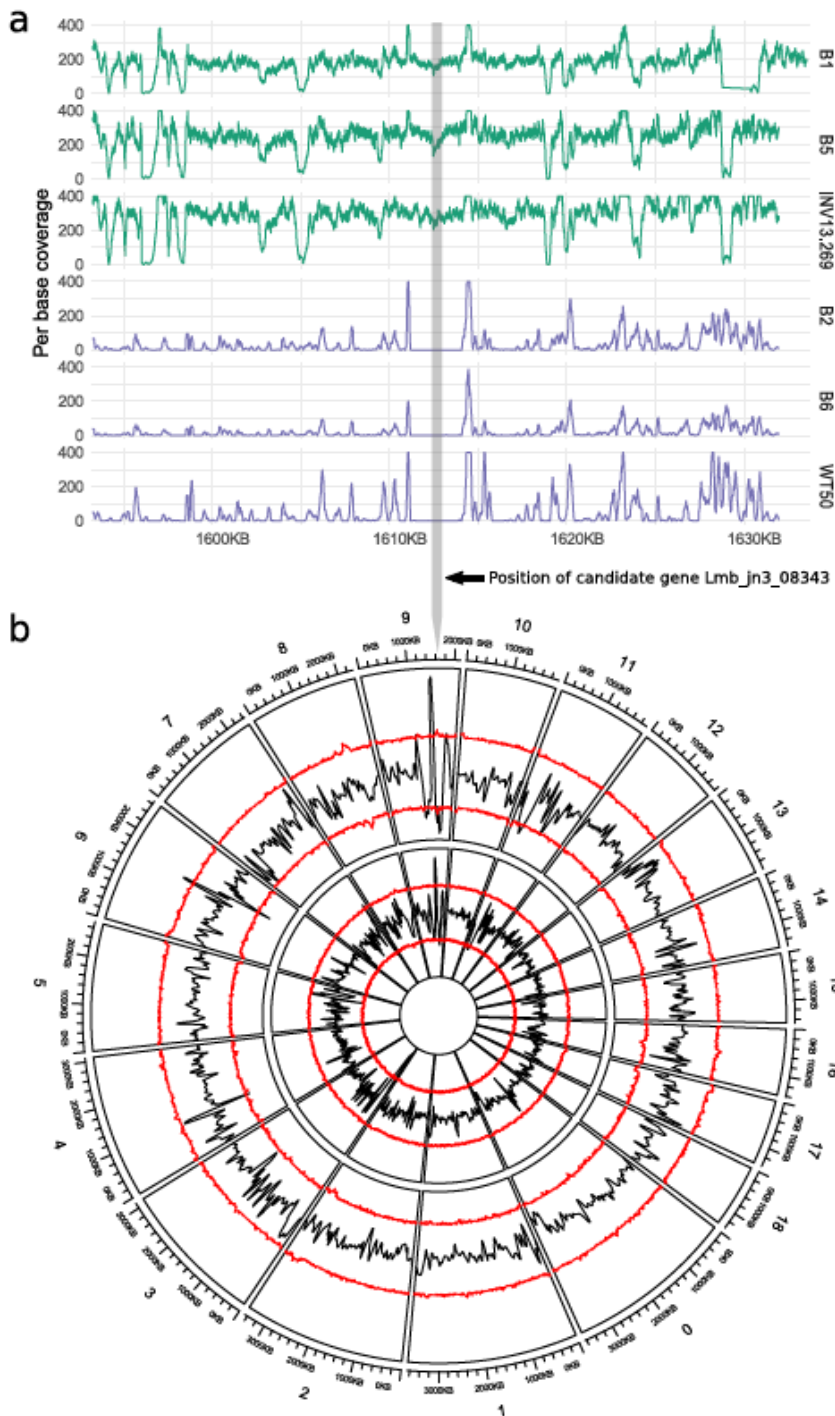

**FIGURE 2** Identification of the candidate region for *AvrLmS* by bulked segregant sequencing. (a) Per base coverage for all samples (not including Bulk 3 and 4, *AvrLm7* and *avrLm7* respectively) for 20kb upstream and downstream of the gene *Lmb\_jn3\_08343* (coding sequence demarcated with grey vertical bar) on scaffold 9 (JN3\_SC09). Samples with *AvrLmS* are shown in green and those with *avrLmS* in purple. Y-axis limit was set to 400. (b) Circos plot of  $\Delta(\text{SNP-index})$  between Bulk 1/2 with *AvrLmS* (outer circle) and Bulk 5/6 with *AvrLmS+AvrLm7* (inner circle) for the 19 scaffolds larger than 1Mb. Confidence intervals of 99% (red) are shown. The y-axis is bounded from -0.5 to 0.8 for the outer plots and from -0.9 to 0.9 for the inner plots. The shared QTL for *AvrLmS* is located on scaffold 9. Coordinates for QTL are provided in Supplementary Tables S5 and S6.

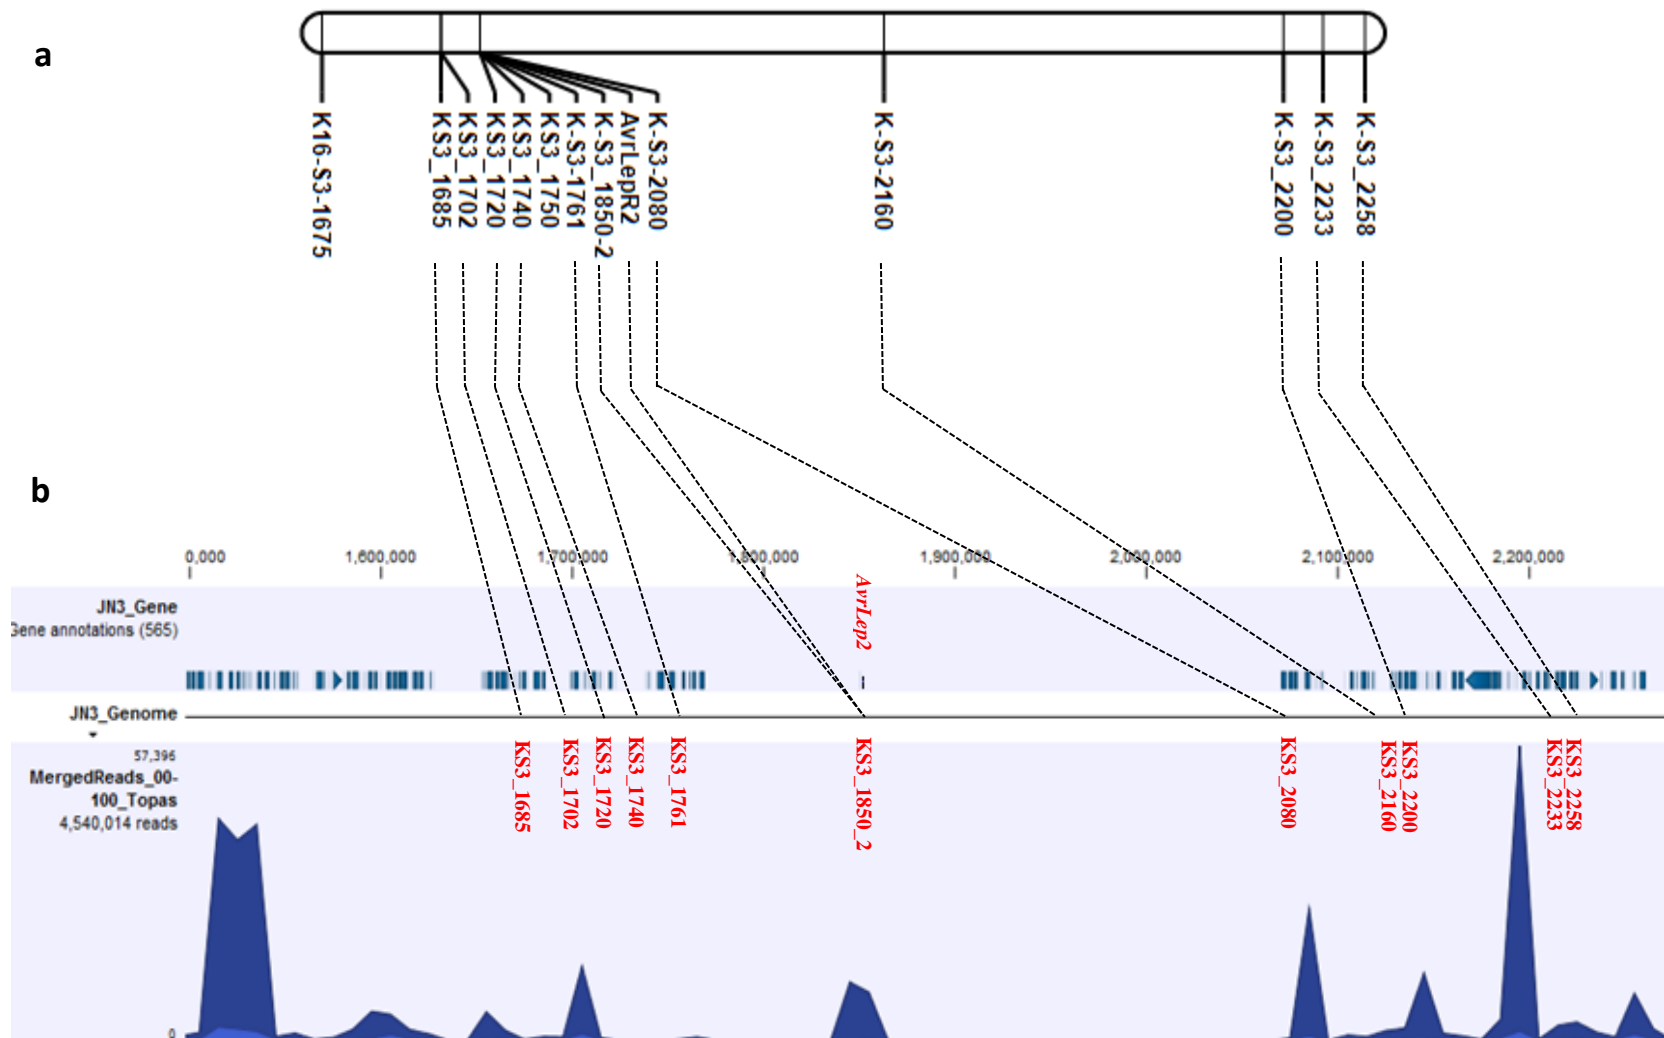

**FIGURE 3** Genetic and physical maps of the *AvrLep2* genomic region in *Leptosphaeria maculans* isolate v23.1.3. (a) Position of *AvrLep2* relative to KASP markers on '00-100 x v23.1.3' (SuperContig 3 from v23.1.3 V1 assembly GCF\_000230375.1) map. (b) Physical region spanning the *AvrLep2* locus in the isolate v23.1.3. The top lane denotes predicted genes, bottom lane shows cumulative gene expression level for predicted *L. maculans* genes during infection time course (2-8 dpi).

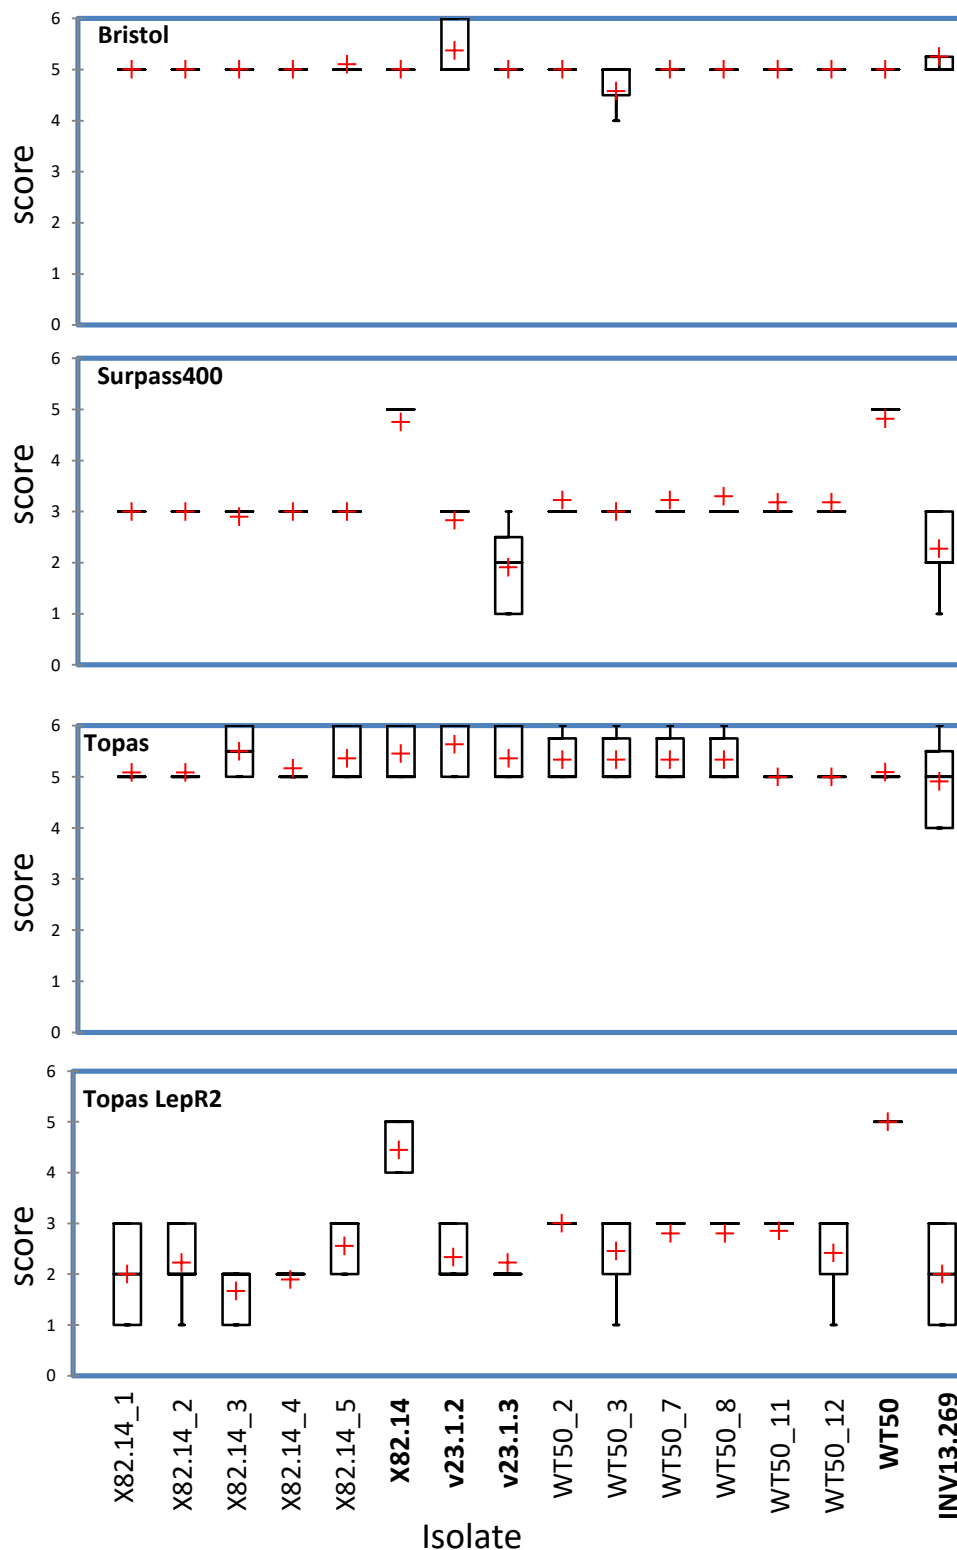

**FIGURE 4** Box plot of rating scores of interaction phenotypes between wild-type or transformed isolates of *Leptosphaeria maculans* and four *Brassica napus* genotypes. From top to bottom: susceptible check Bristol (*Rlm2-Rlm9*), Surpass 400 (*LepR3-Rlm5*), Topas DH16516 (no R gene), Topas-LepR2 (*LepR2*). For each box, the red cross indicates the score mean; the black horizontal line, the score median, the rectangles comprise 75 % (Q1-Q3) of the rating scores. Wild type isolates are in bold; X82.14-i and WT50-j are five and six independent transformed isolates of X82.14 and WT50, respectively, with the candidate gene *Lmb\_jn3\_08343*.

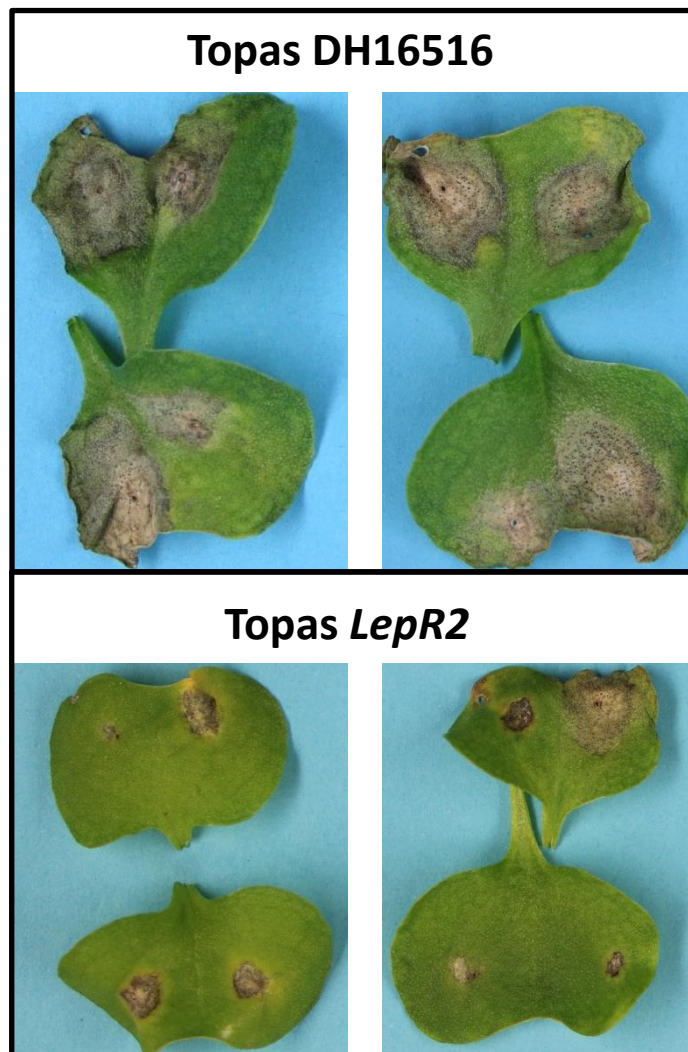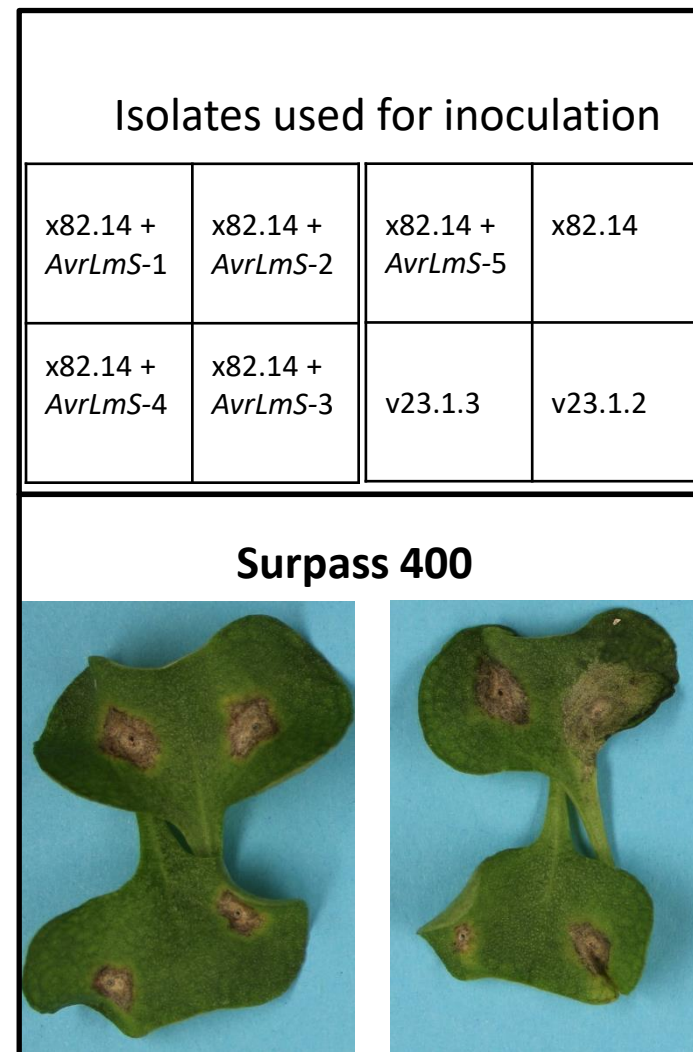

**FIGURE 5** Examples of interaction phenotypes of wild-type and transformed isolates with the *AvrLmS* candidate gene on Topas DH16516, Topas-*LepR2* and Surpass 400. The four isolates inoculated on each plant are described on the up right panel. v23.1.3 and v23.1.2 are avirulent on Topas-*LepR2* and Surpass 400 and X82.14 is virulent. All other isolates are independent transformants issued from the complementation of X82.14 isolate with the *AvrLmS* candidate gene. Pictures are taken 15 days post inoculation under BIOGER's conditions.



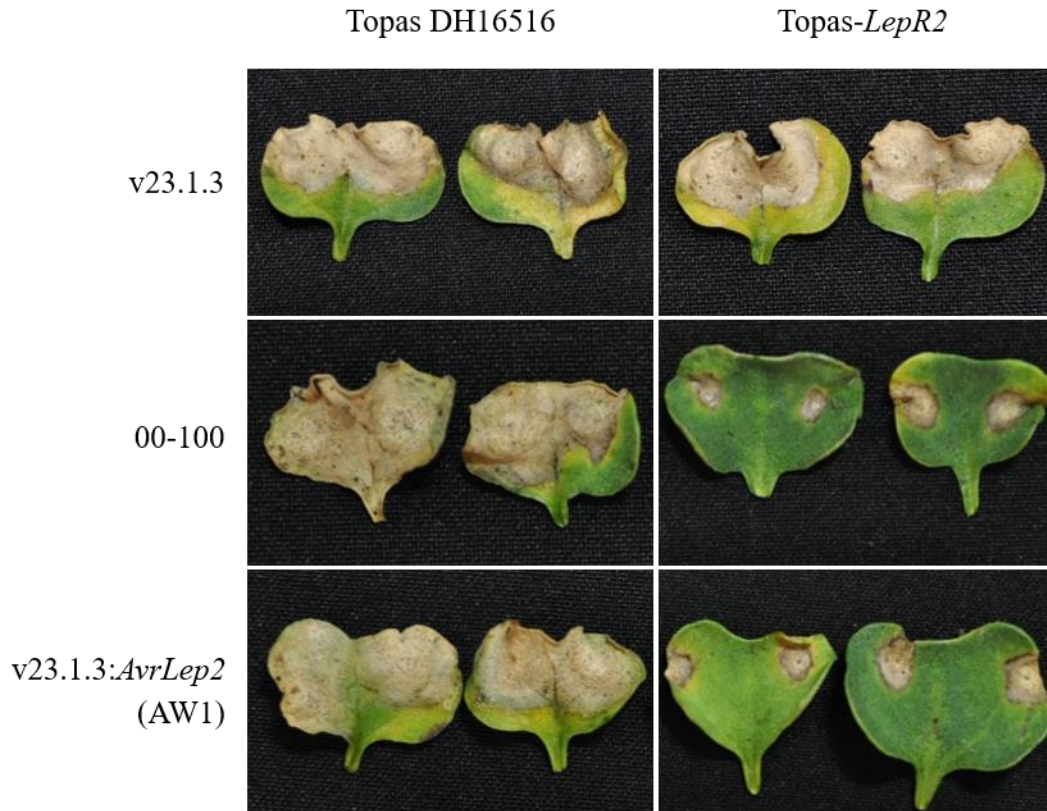

**FIGURE 6** Phenotypic interaction of wild type and complemented *Leptosphaeria maculans* isolates on the cotyledons of control (Topas DH16516) and Topas-*LepR2* lines. Photographs of the infected cotyledons were taken 14 days post-inoculation. v23.1.3:*AvrLep2* (AW1) is a transformant with pNL11-*AvrLep2* construct (*AvrLep2* avirulent allele coding region was amplified from isolate 00-100, driven its native promoter).

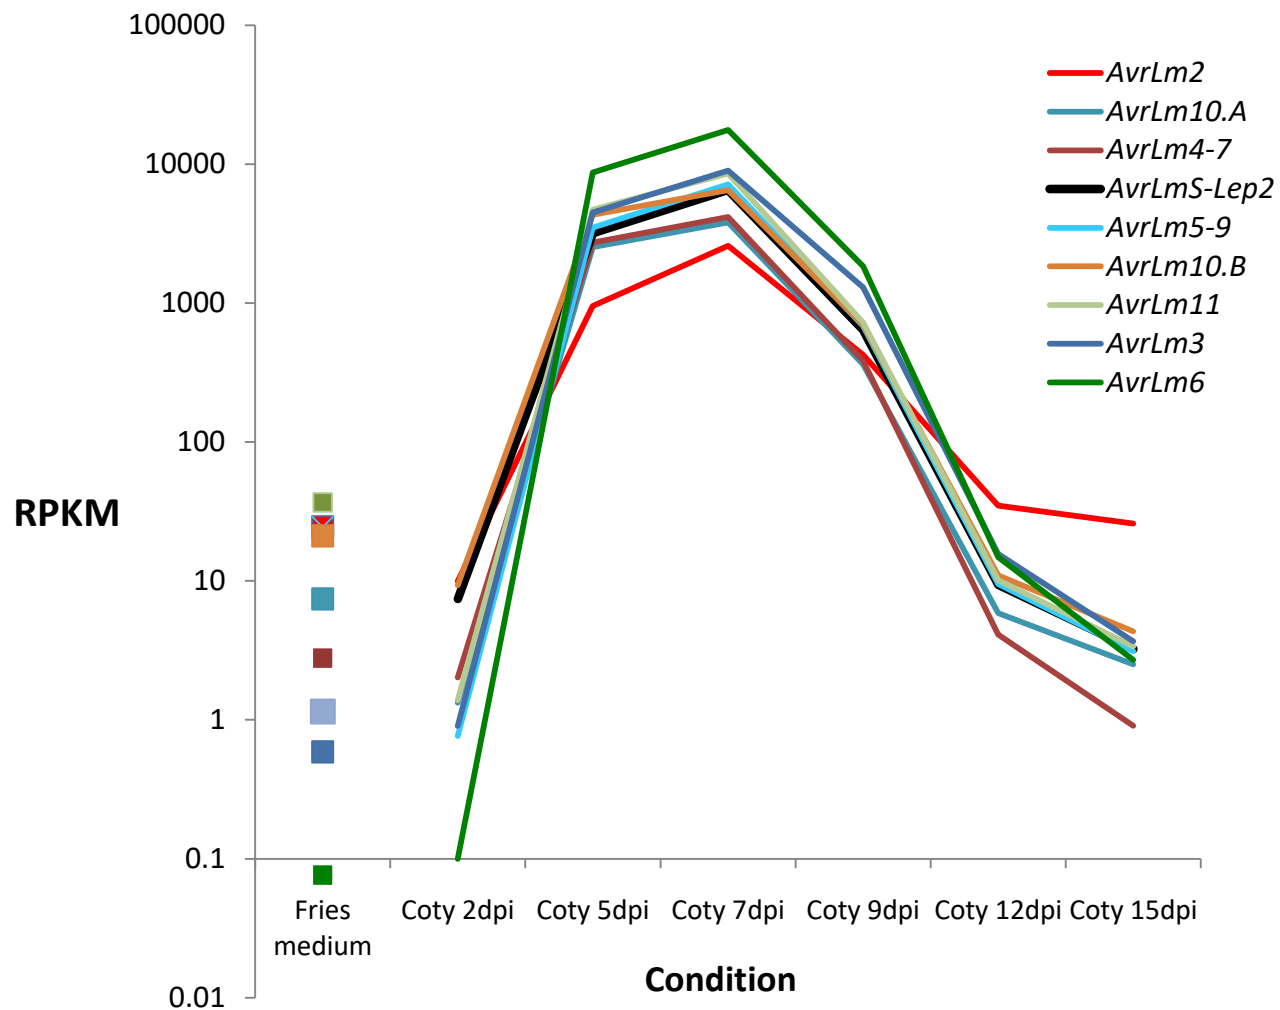

**FIGURE 7** Expression of Lmb\_jn3\_08343 upon infection of oilseed rape cotyledons. Expression kinetics of Lmb\_jn3\_08343 was compared to that of previously cloned *AvrLm* genes. RNA-Seq data were obtained for isolate v23.1.2 *in vitro* (Fries medium condition) and following infection of cotyledons of cv. Darmor-*bzh* at 2, 5, 7, 8, 12 and 15 days post infection (dpi). Values are RPKM.

## Adult Plant Test

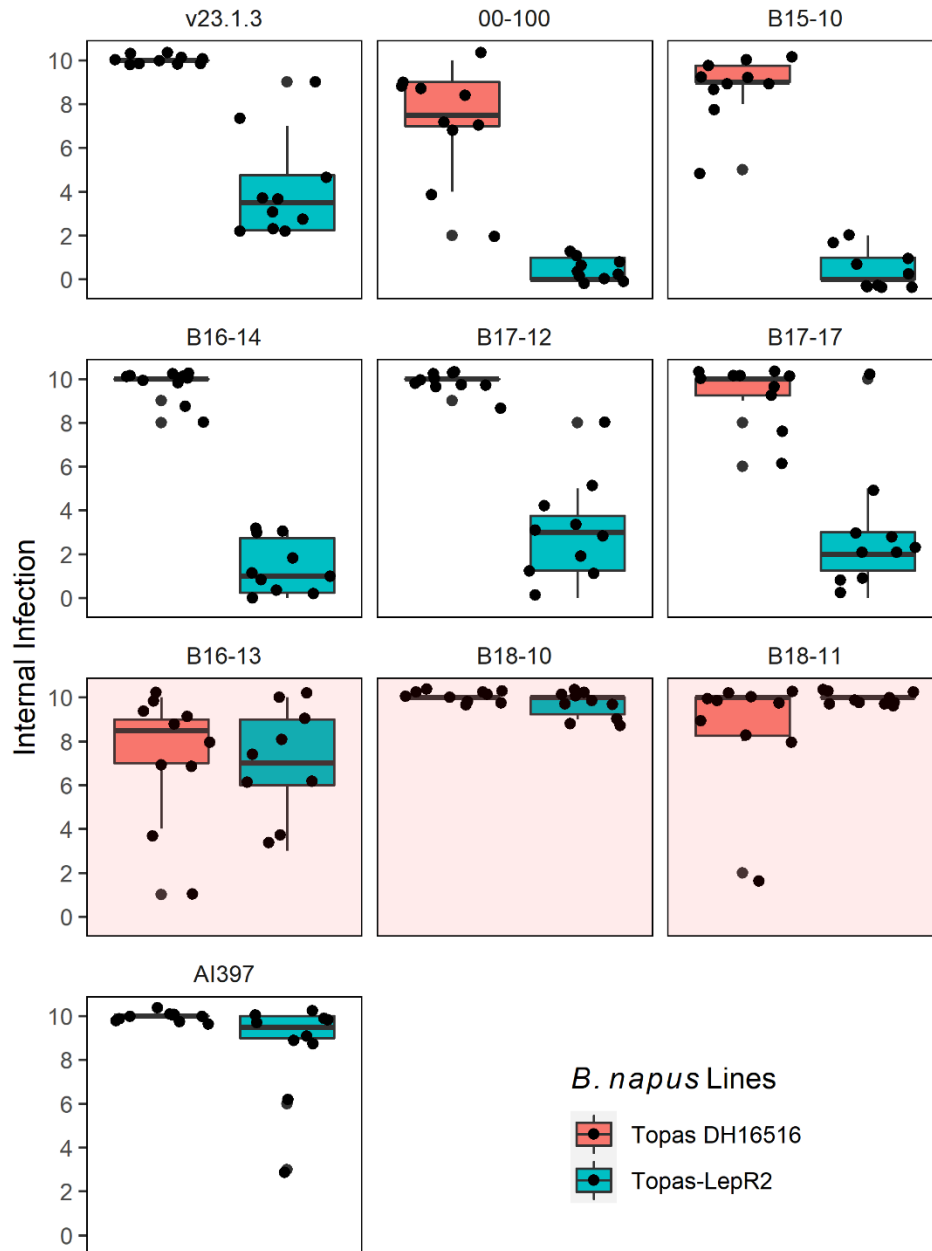

**FIGURE 8** Box & Whisker Plot for internal infection of Topas DH16516 (red) and Topas-LepR2 (blue) of adult plants by 10 *L. maculans* isolates. Data points (black dots) indicate internal infection (0-10 scale) of individual plants (10 per test). Boxes denote interquartile range (Q<sub>1</sub> to Q<sub>3</sub>), black bars show median score and whiskers denote range of distribution. Data points outside the whiskers (< 1.5 Q<sub>3</sub> or > 1.5 Q<sub>1</sub>) are considered outliers. Red-shaded panels indicate isolates for which *AvrLep2* is deleted.
